# Supplementary material for: BiCl3-catalyzed green synthesis of 4-hydroxy-2-quinolone analogues under microwave irradiation
Source: Royal Society of Chemistry journal article supplement (doi:10.1039/d3ra05289c), 2023-01-01
Supplement: d3ra05289c1.pdf [file d3ra05289c1.pdf]

## **BiCl<sub>3</sub>-catalyzed green synthesis of 4-hydroxy-2-quinolone analogues under microwave irradiation**

**Yousra Ouafa Bouone<sup>a,b</sup>, Abdeslem Bouzina<sup>a\*</sup>, Rayene Sayad<sup>a</sup>, Abdelhak Djemel<sup>c</sup>, Farouk Benaceur<sup>c</sup>, Abdelhalim Zoukel<sup>d</sup>, Malika Ibrahim-Ouali<sup>e</sup>, Nour-Eddine Aouf<sup>a</sup>, Fouzia Bouchareb<sup>b,f</sup>**

<sup>a</sup>Laboratory of Applied Organic Chemistry, Bioorganic Chemistry Group, Department of Chemistry, Sciences Faculty, Badji-Mokhtar - Annaba University, Box 12, 23000 Annaba, Algeria.

<sup>b</sup>Laboratory of Applied Organic Chemistry, Synthesis of Biomolecules and Molecular Modelling Group, Department of Chemistry, Sciences Faculty, Badji-Mokhtar - Annaba University, Box 12, 23000 Annaba, Algeria.

<sup>c</sup>Research Unit in Medicinal Plants, URPM, 3000 Laghouat, attached to Research Center of Biotechnology, CRBt, 25000 Constantine, Algeria.

<sup>d</sup>Technical platform of physico-chemical analysis (PTAPC-Laghout-CRAPC), University of Laghouat, Laghouat 03000, Algeria.

<sup>e</sup>Aix Marseille Univ, CNRS, Centrale Marseille, iSm2, F-13397 Marseille, France.

<sup>f</sup>Faculty of Sciences and Technology, Department of Chemistry, Chadli Bendjedid - EL Tarf University, P.O.Box: 73, El Tarf 36000 Algeria.

\*Corresponding Author. Email: [abdeslem.bouzina@univ-annaba.dz](mailto:abdeslem.bouzina@univ-annaba.dz); [bouzinaabdeslem@yahoo.fr](mailto:bouzinaabdeslem@yahoo.fr)

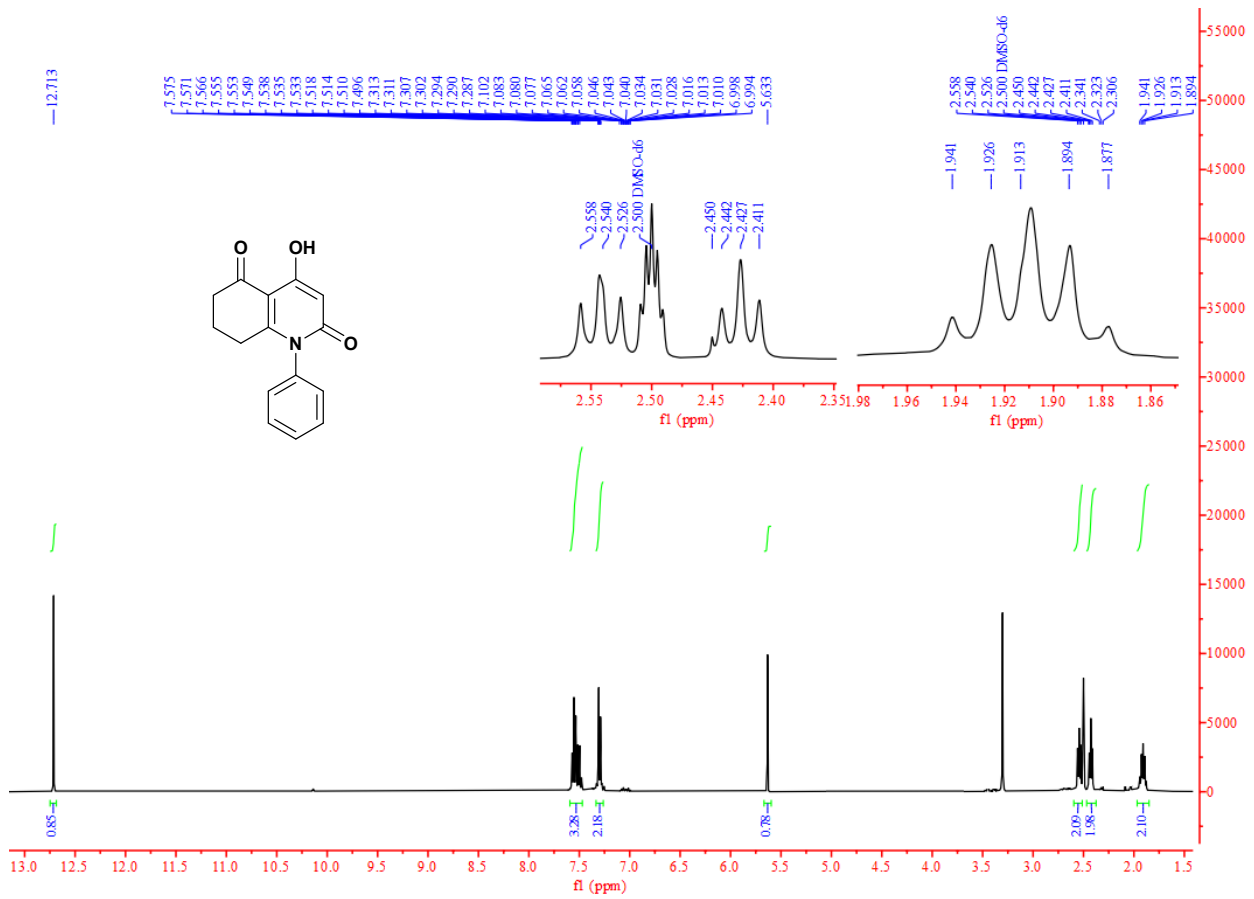

**NMR <sup>1</sup>H spectrum (400 MHz, DMSO-d<sub>6</sub>): 4-hydroxy-1-phenyl-7,8-dihydroquinoline-2,5(1H,6H)-dione**

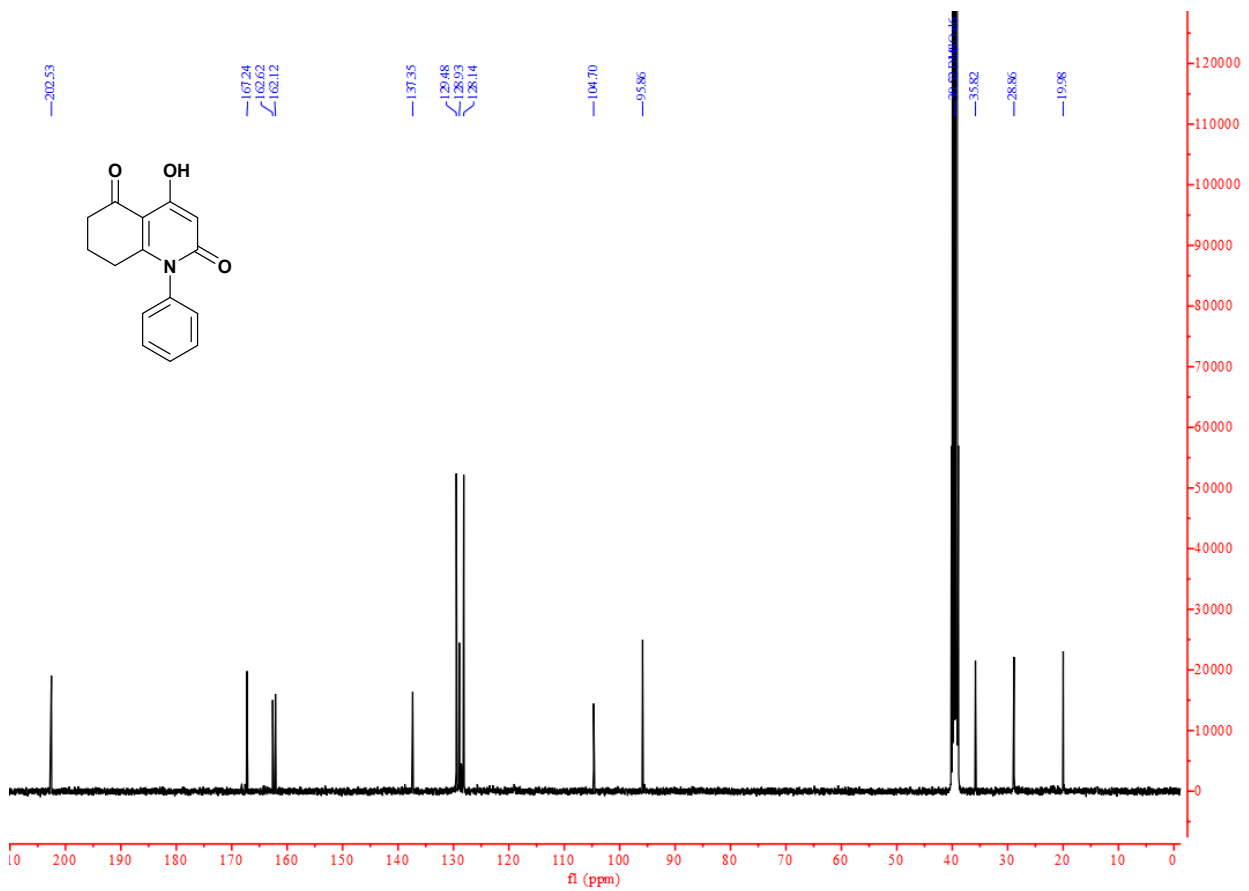

**NMR <sup>13</sup>C spectrum (101 MHz, DMSO-d<sub>6</sub>): 4-hydroxy-1-phenyl-7,8-dihydroquinoline-2,5(1H,6H)-dione**

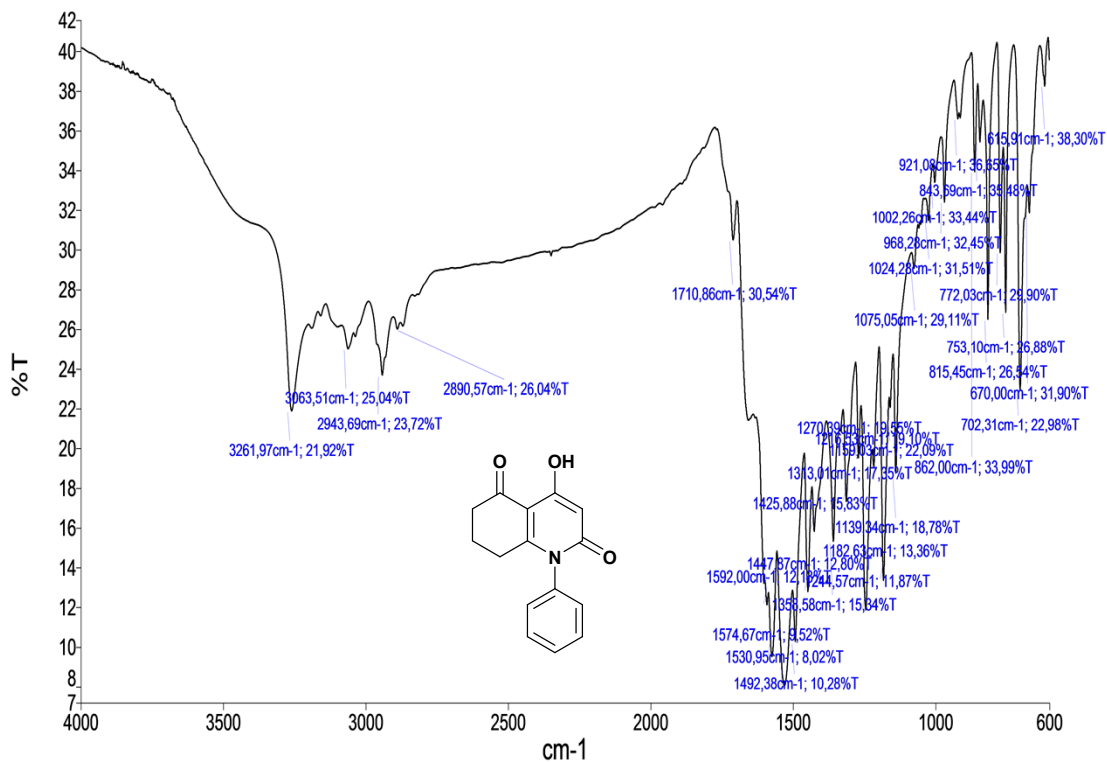

IR spectrum: 4-hydroxy-1-phenyl-7,8-dihydroquinoline-2,5(1H,6H)-dione

MS Spectrum

Line#:1 R.Time:----(Scan#:----)

MassPeaks:219

Spectrum Mode:Averaged 0,567-0,600(35-37) Base Peak:105(297264)

BG Mode:Calc Segment 1 - Event 1

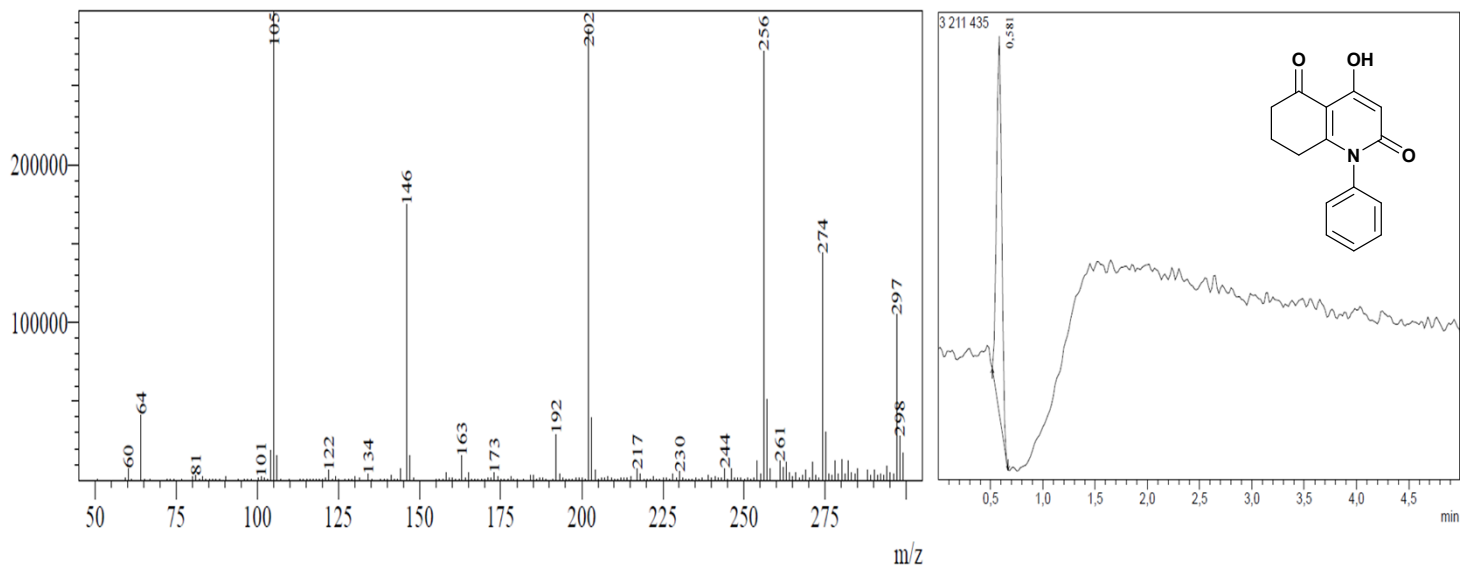

LC-MS spectrum: 4-hydroxy-1-phenyl-7,8-dihydroquinoline-2,5(1H,6H)-dione

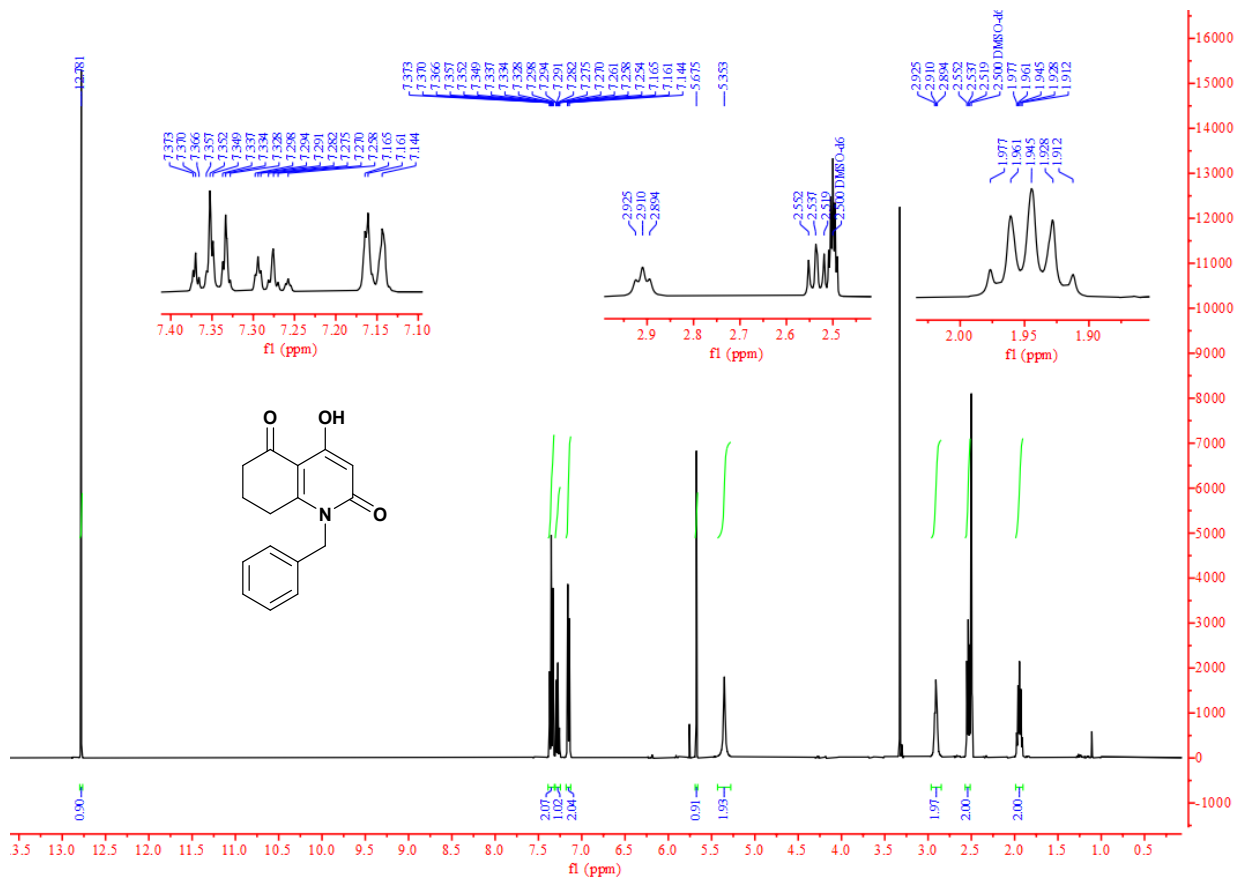

**NMR <sup>1</sup>H spectrum (400 MHz, DMSO-d<sub>6</sub>): 1-benzyl-4-hydroxy-7,8-dihydroquinoline-2,5(1H,6H)-dione**

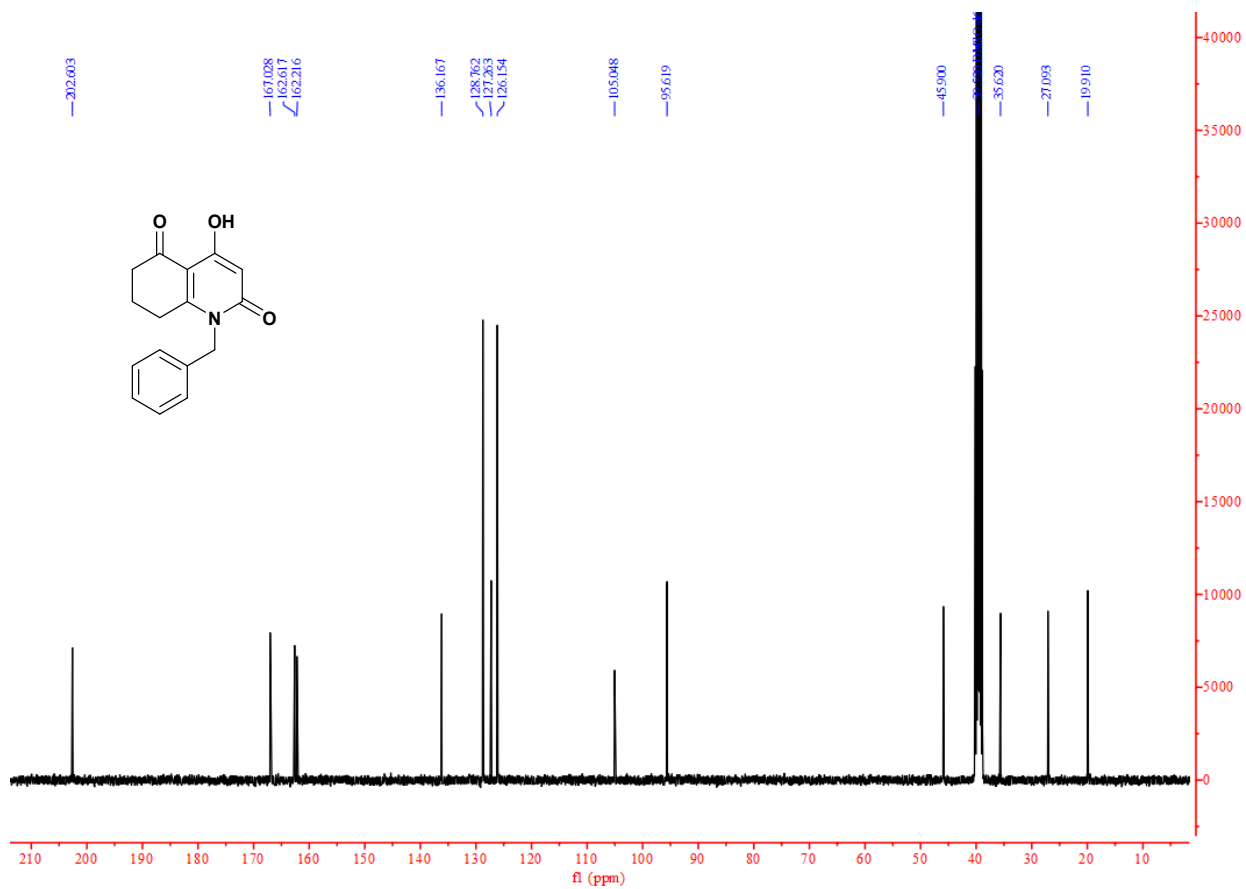

**NMR <sup>13</sup>C spectrum (101 MHz, DMSO-d<sub>6</sub>): 1-benzyl-4-hydroxy-7,8-dihydroquinoline-2,5(1H,6H)-dione**

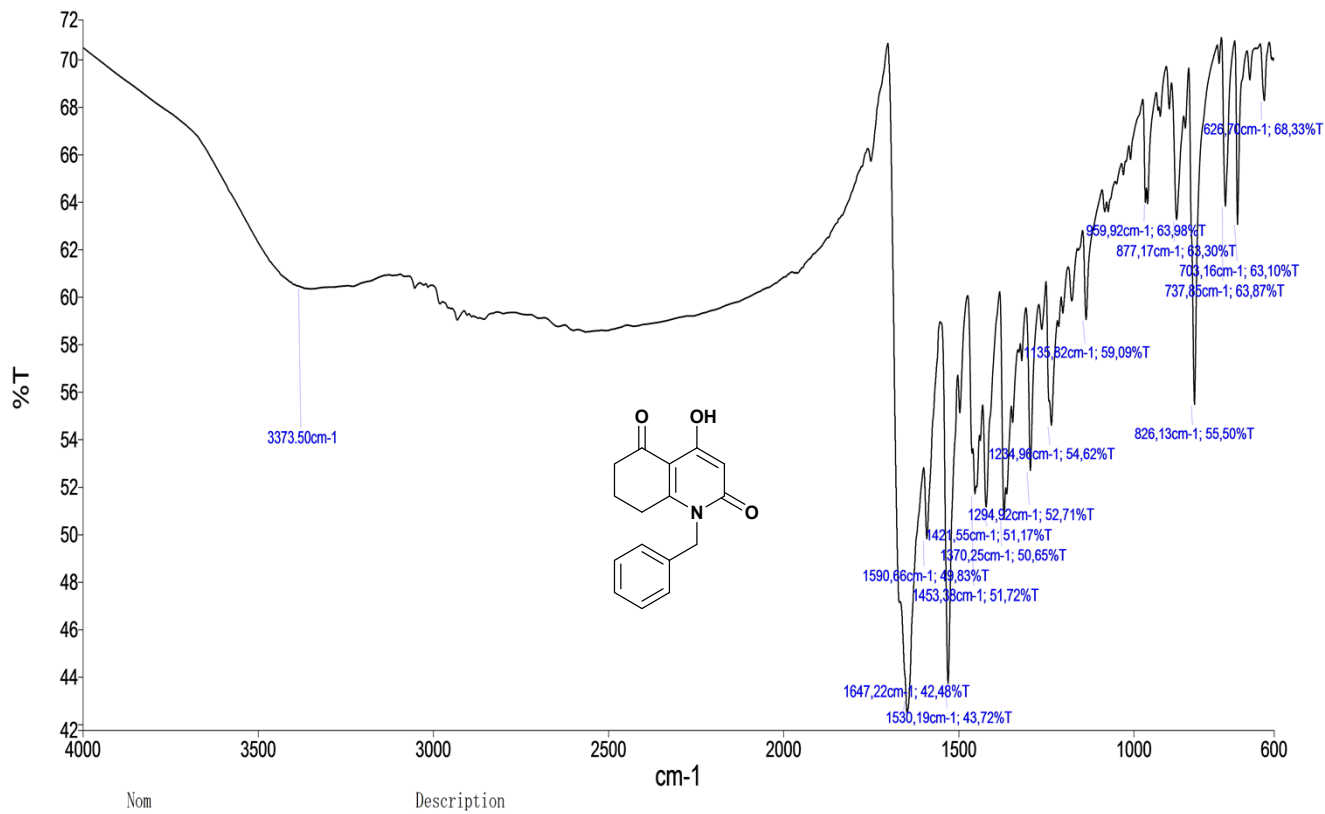

Nom Description  
 PService 1228\_1 Échantillon 1228 Par PService Date lundi, décembre 12 2022

**IR spectrum: 1-benzyl-4-hydroxy-7,8-dihydroquinoline-2,5(1H,6H)-dione**

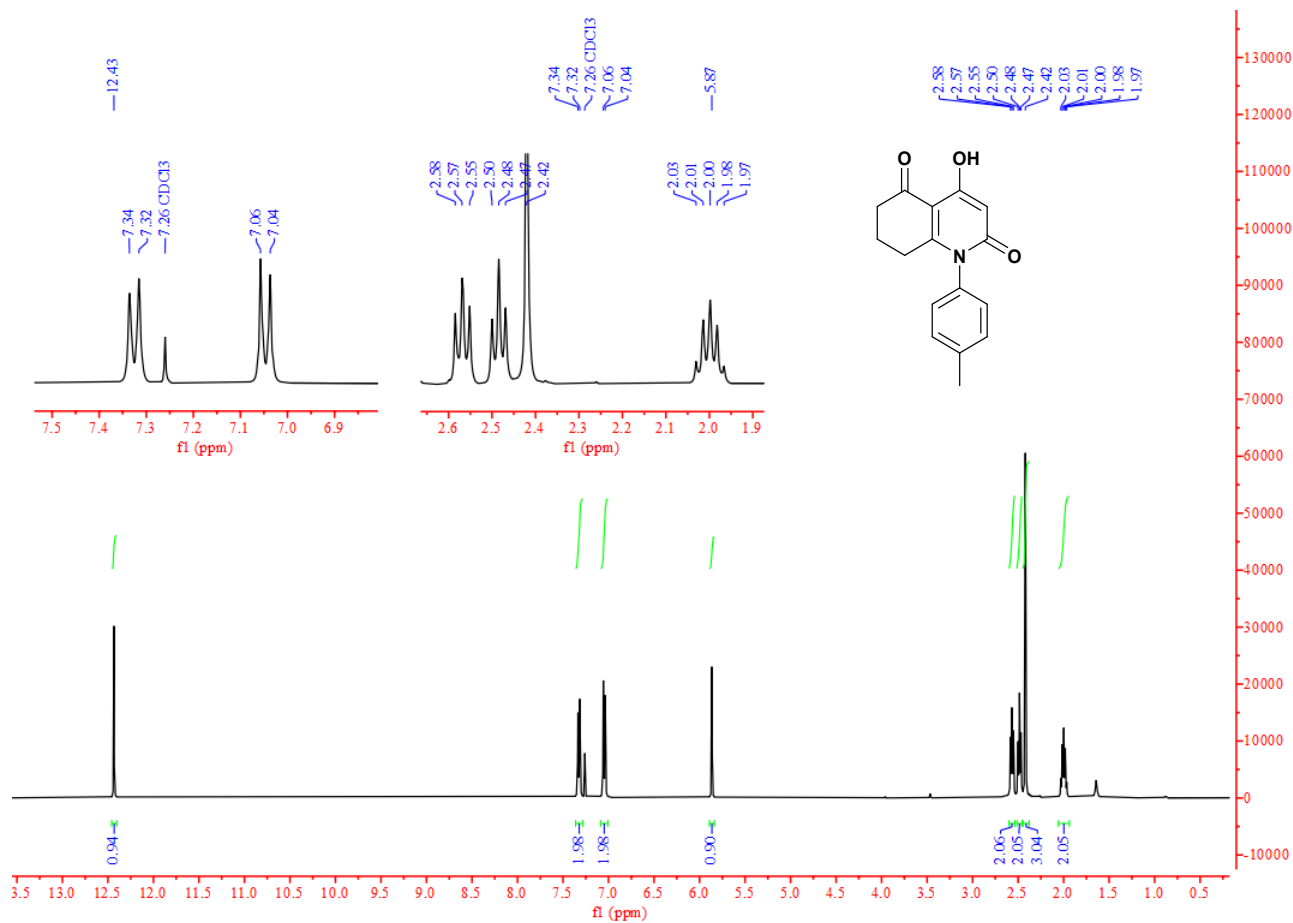

**NMR  $^1\text{H}$  spectrum (400 MHz,  $\text{CDCl}_3$ ): 4-hydroxy-1-(p-tolyl)-7,8-dihydroquinoline-2,5(1H,6H)-dione**

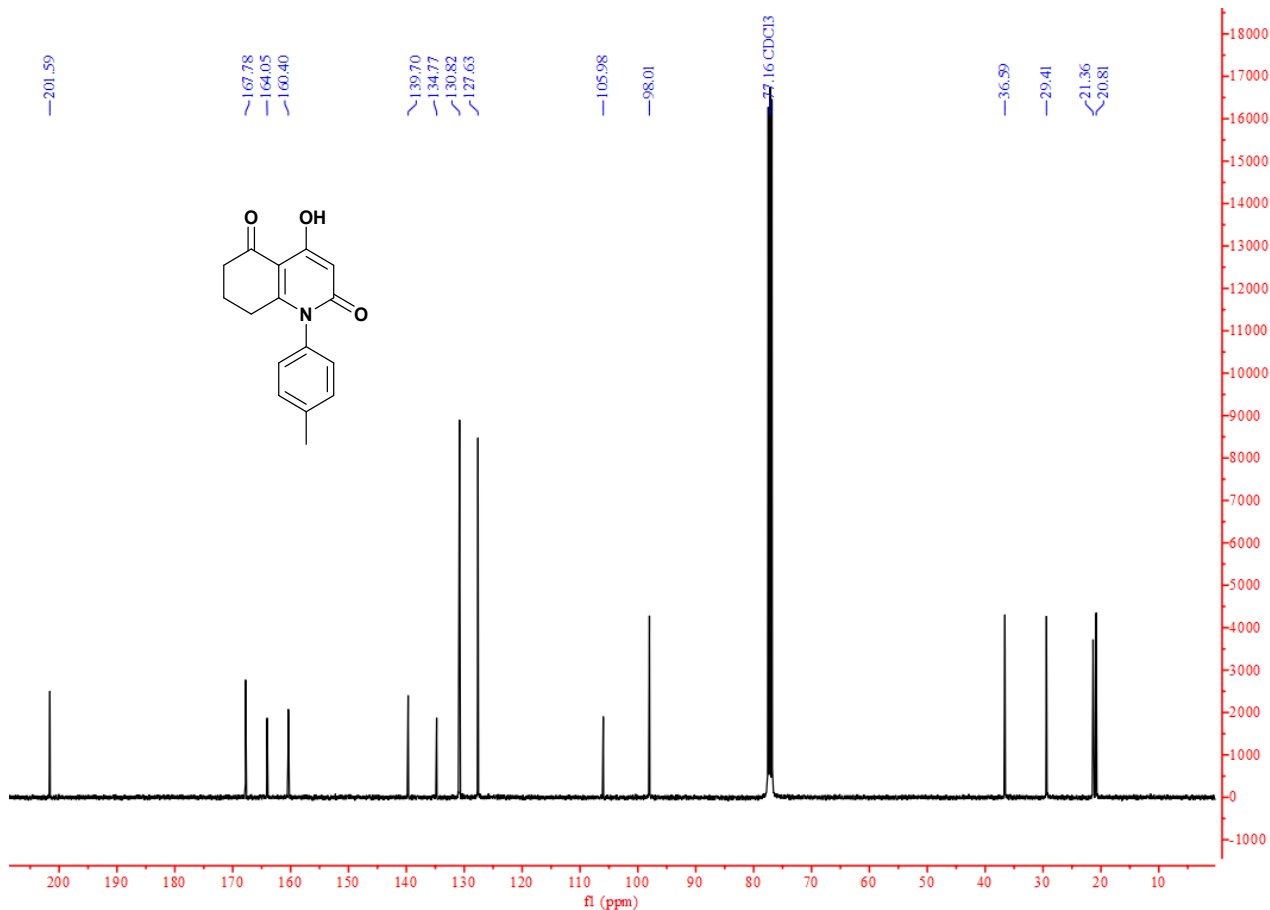

NMR <sup>13</sup>C spectrum (101 MHz, CDCl<sub>3</sub>): 4-hydroxy-1-(p-tolyl)-7,8-dihydroquinoline-2,5(1H,6H)-dione

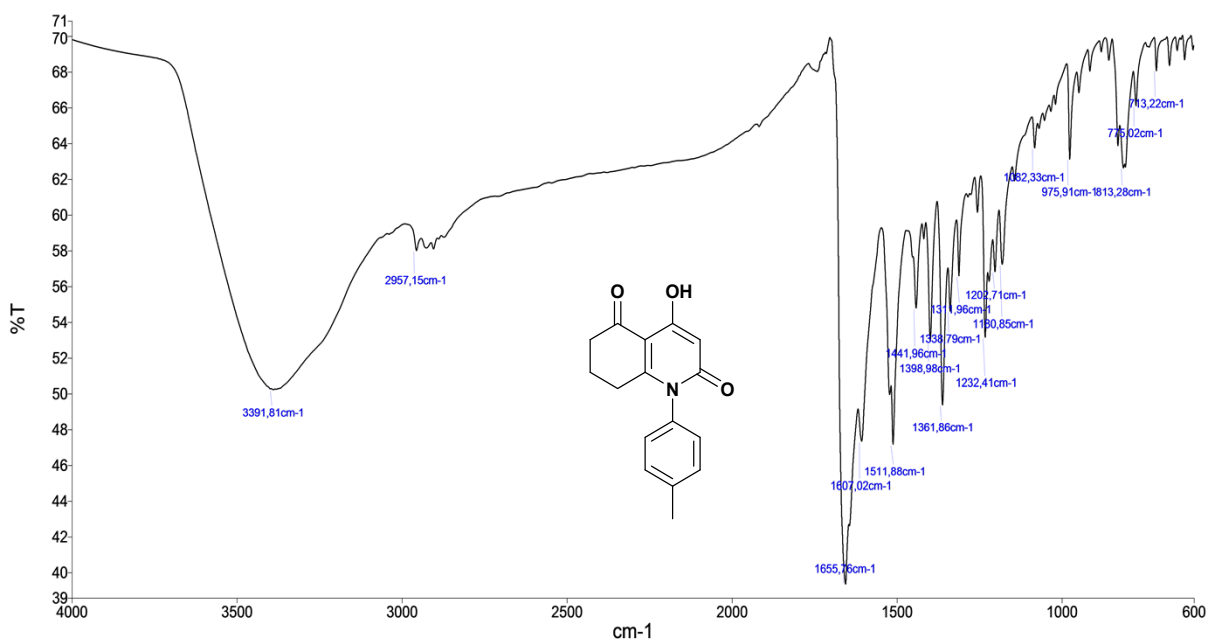

IR spectrum: 4-hydroxy-1-(p-tolyl)-7,8-dihydroquinoline-2,5(1H,6H)-dione

Nom Description  
 Administrator 464\_1 Échantillon 464 Par Administrator Date lundi, mars 20 2023

MS Spectrum

Line#:1 R.Time:----(Scan#:----)

MassPeaks:175

Spectrum Mode:Averaged 0,567-0,600(35-37) Base Peak:270(560933)

BG Mode:Calc Segment 1 - Event 1

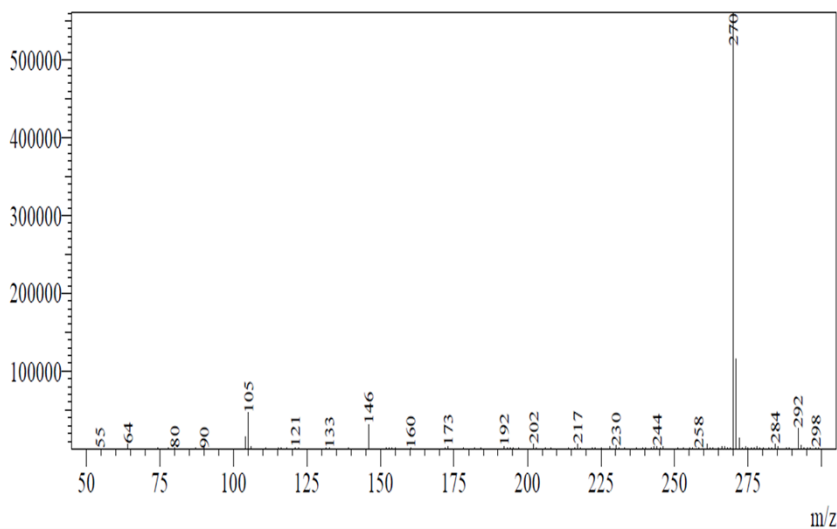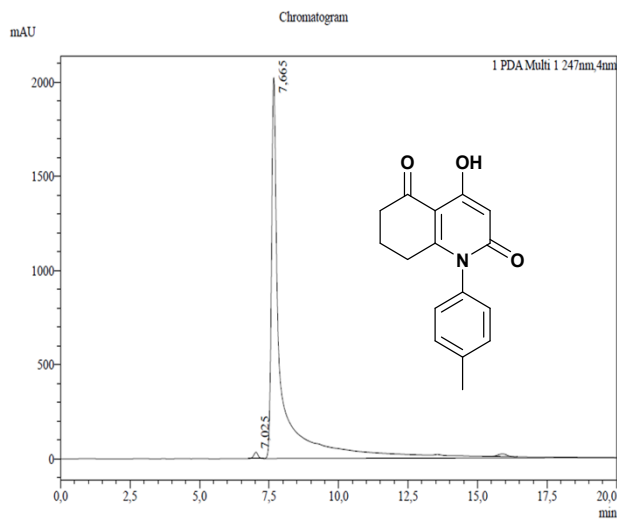

LC-MS spectrum: 4-hydroxy-1-(p-tolyl)-7,8-dihydroquinoline-2,5(1H,6H)-dione

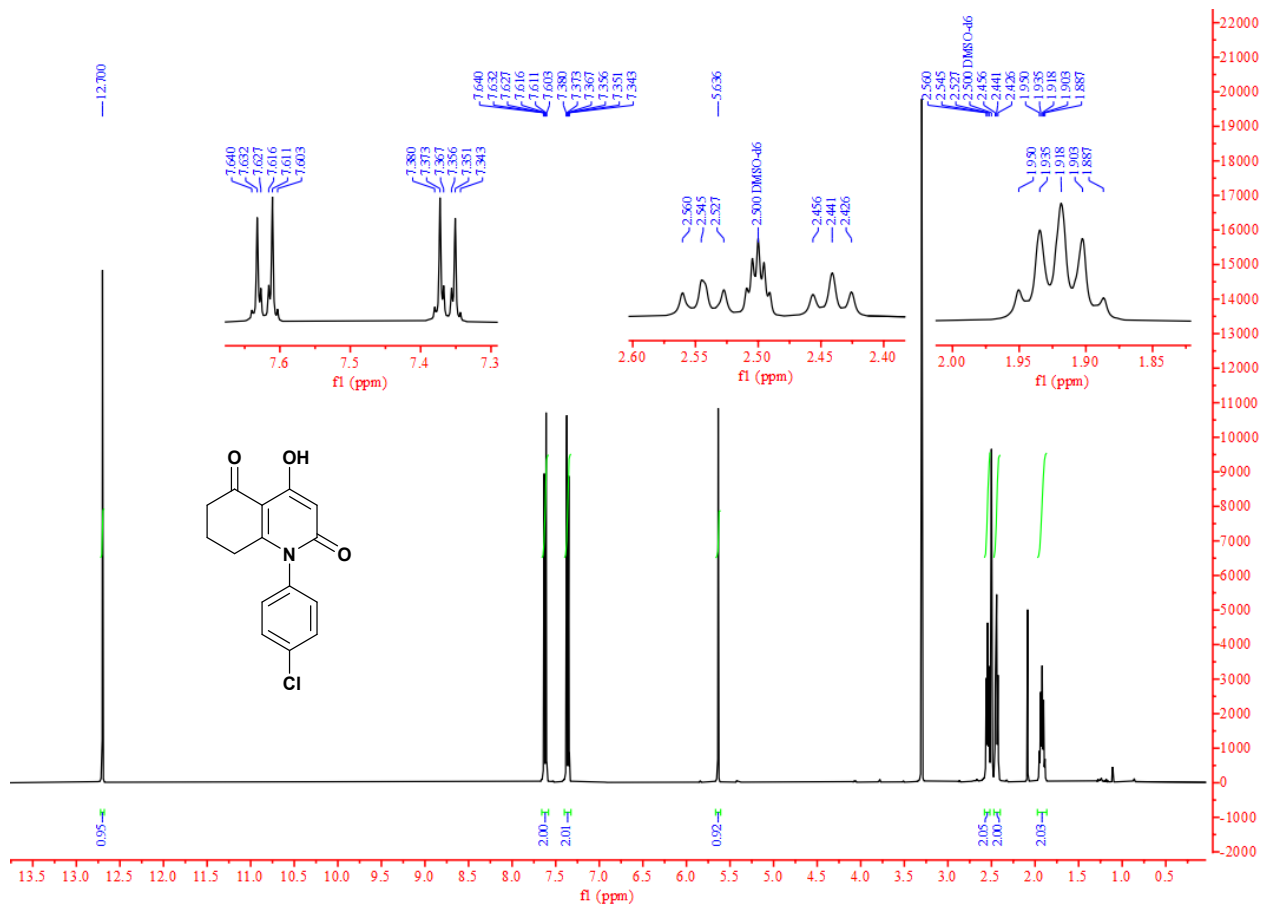

NMR <sup>1</sup>H spectrum (400 MHz, DMSO-d<sub>6</sub>): 1-(4-chlorophenyl)-4-hydroxy-7,8-dihydroquinoline-2,5(1H,6H)-dione

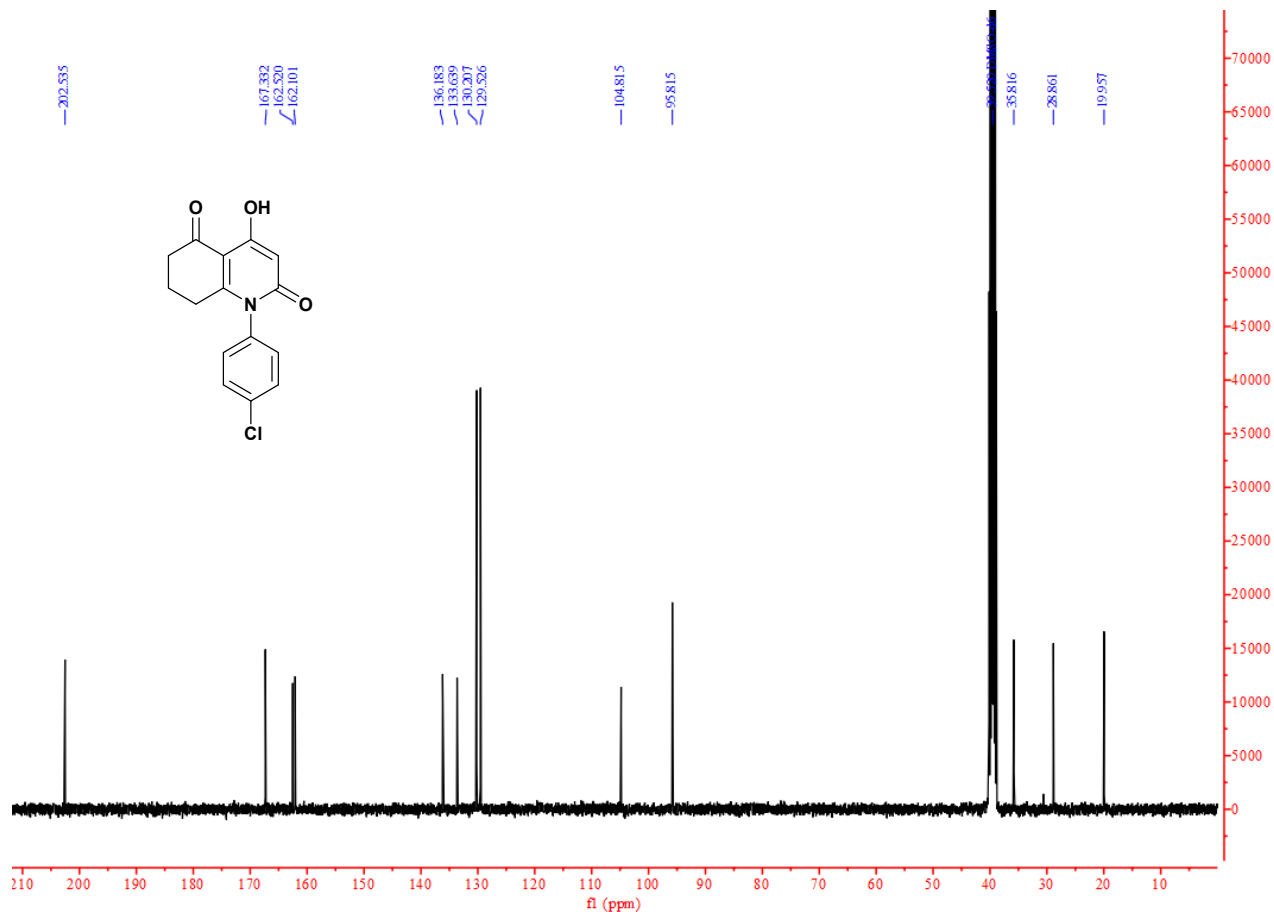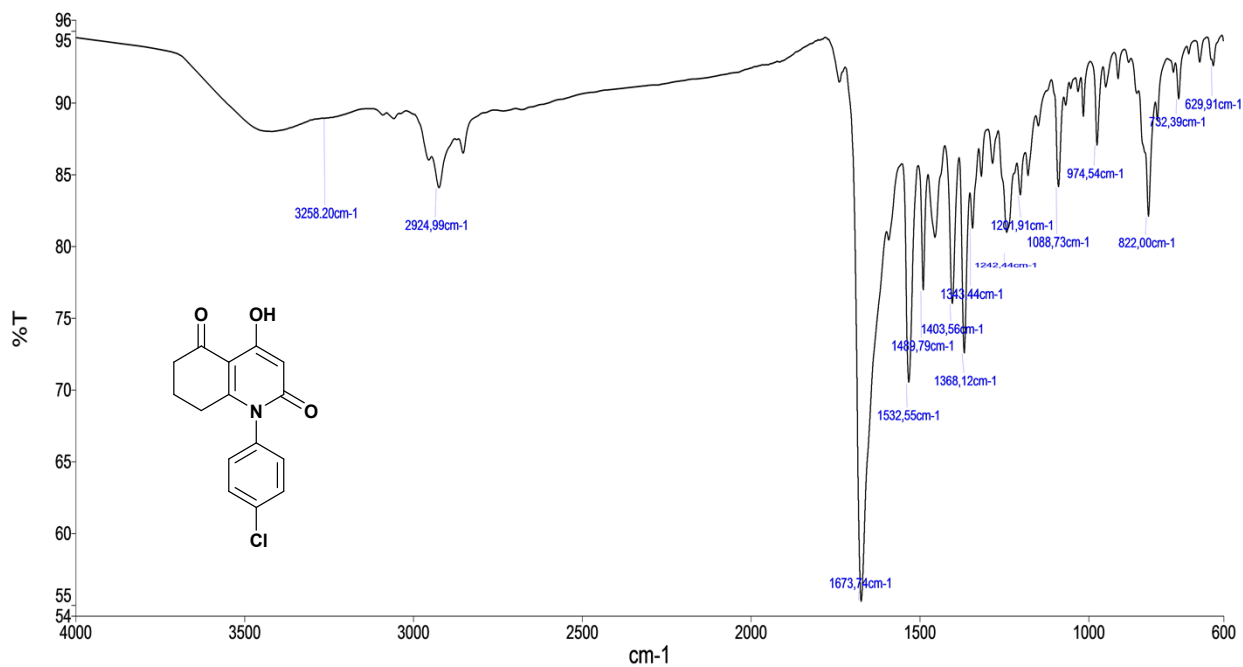



MS Spectrum

Line#:1 R.Time:----(Scan#:----)  
 MassPeaks:238  
 Spectrum Mode:Averaged 0,567-0,600(35-37) Base Peak:202(1076800)  
 BG Mode:Calc Segment 1 - Event 1

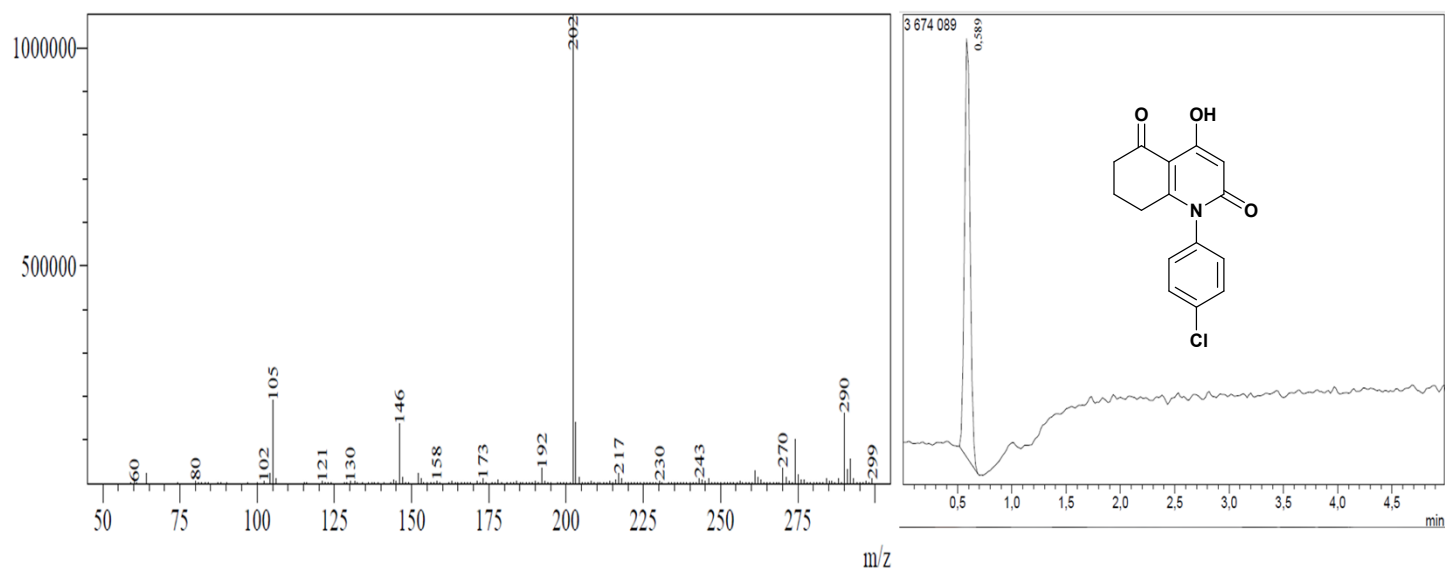

LC-MS spectrum: 1-(4-chlorophenyl)-4-hydroxy-7,8-dihydroquinoline-2,5(1H,6H)-dione

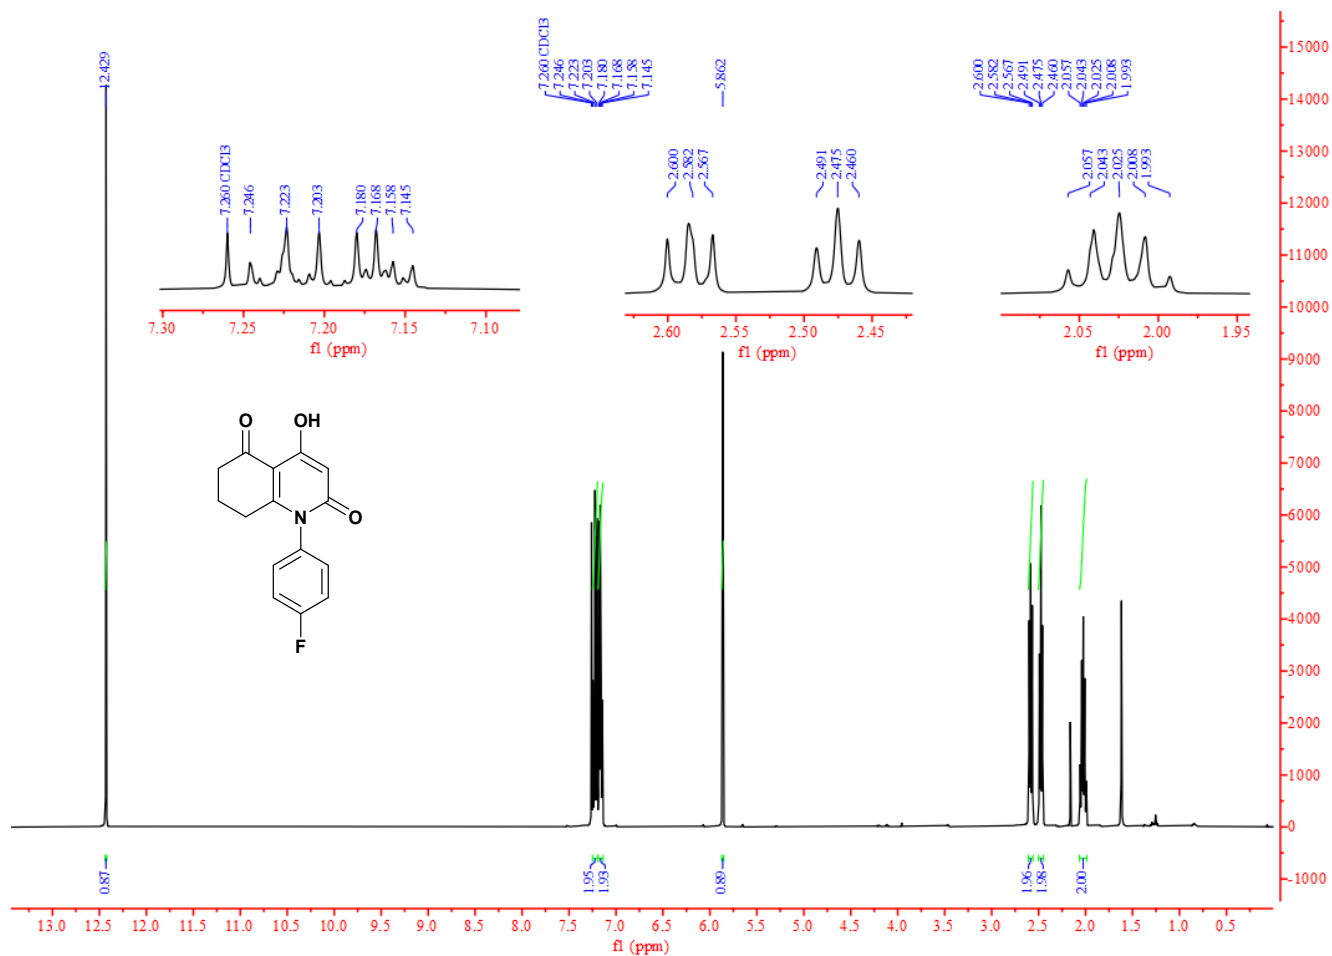

NMR <sup>1</sup>H spectrum (400 MHz, CDCl<sub>3</sub>): 1-(4-fluorophenyl)-4-hydroxy-7,8-dihydroquinoline-2,5(1H,6H)-dione

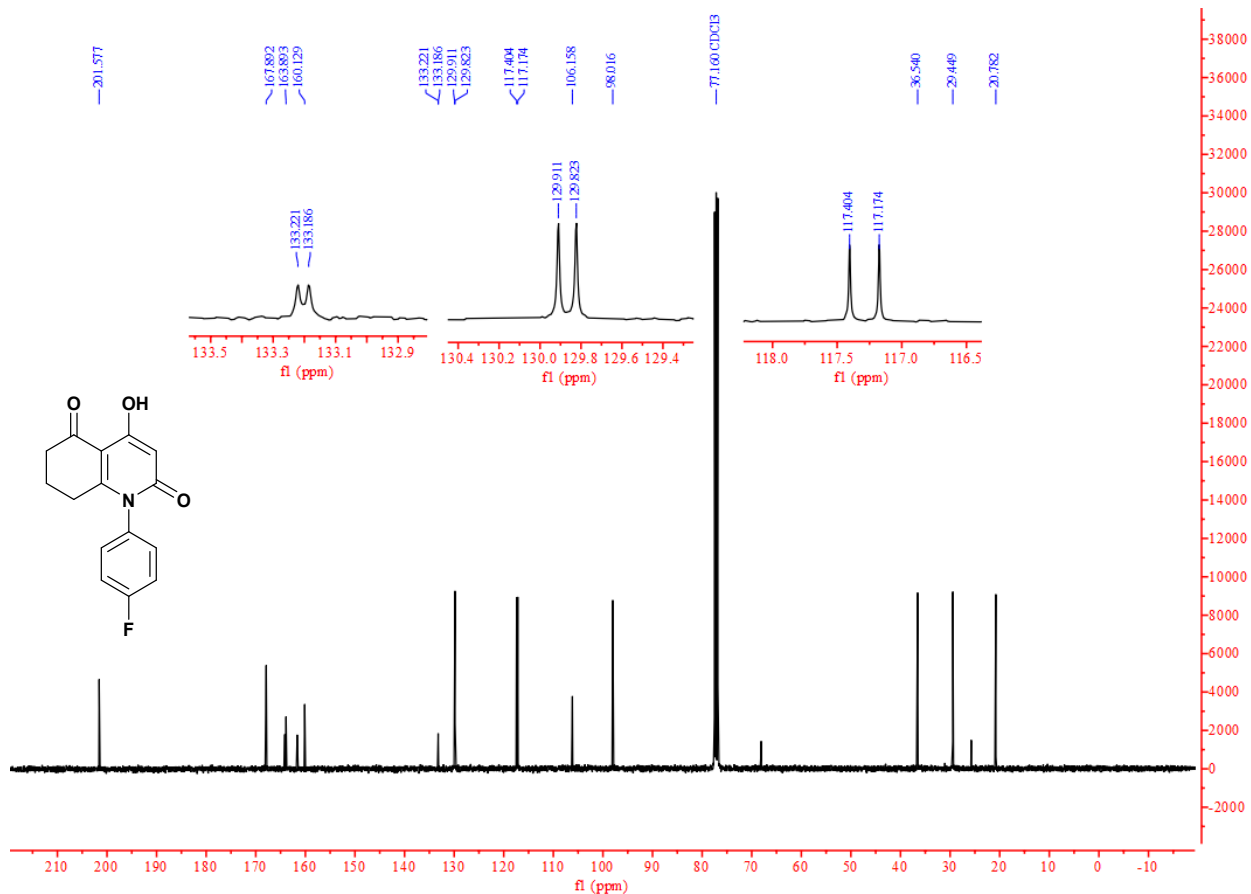

**NMR <sup>13</sup>C spectrum (101 MHz, CDCl<sub>3</sub>): 1-(4-fluorophenyl)-4-hydroxy-7,8-dihydroquinoline-2,5(1H,6H)-dione**

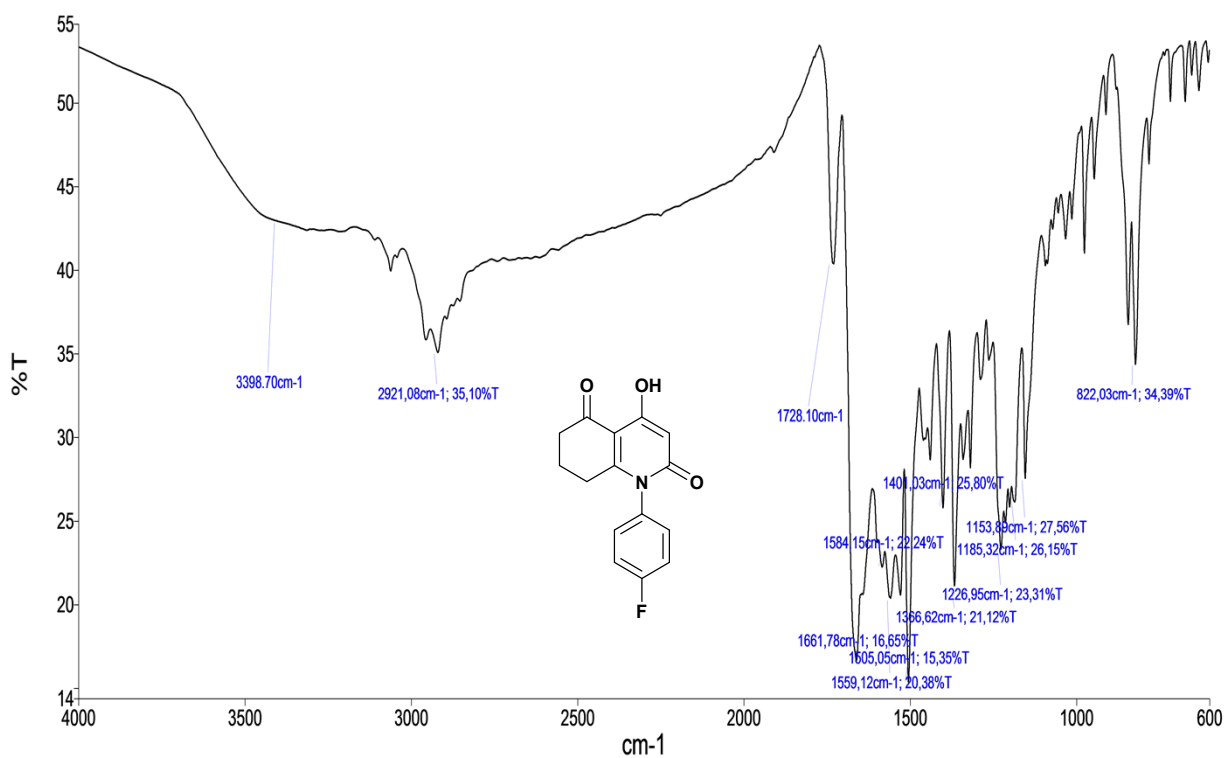

**IR spectrum: 1-(4-fluorophenyl)-4-hydroxy-7,8-dihydroquinoline-2,5(1H,6H)-dione**

MS Spectrum

Line#:1 R.Time:----(Scan#:----)

MassPeaks:231

Spectrum Mode:Averaged 0,583-0,617(36-38) Base Peak:202(2561290)

BG Mode:Calc Segment 1 - Event 1

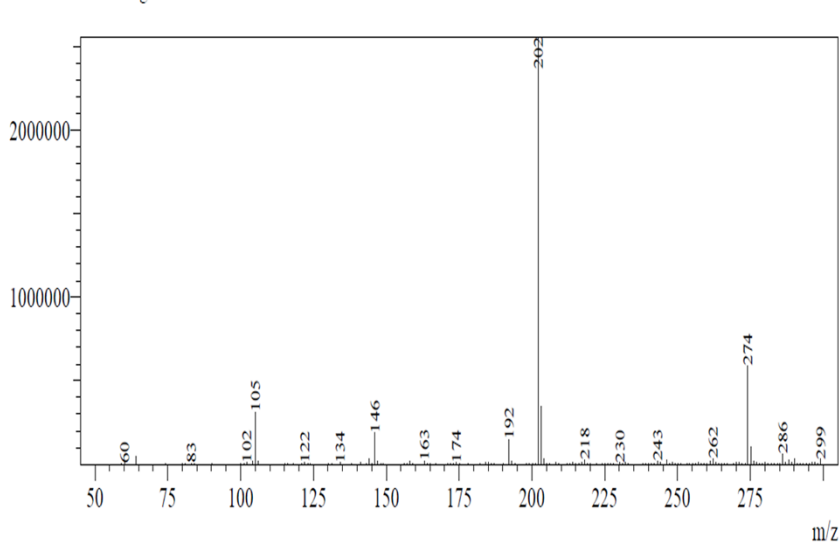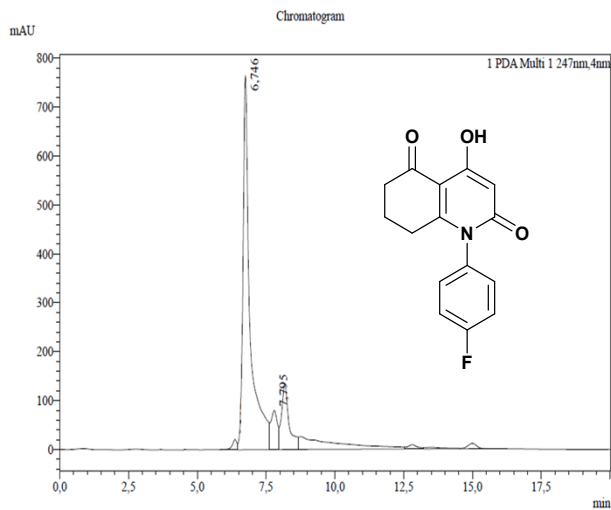

LC-MS spectrum: 1-(4-fluorophenyl)-4-hydroxy-7,8-dihydroquinoline-2,5(1H,6H)-dione

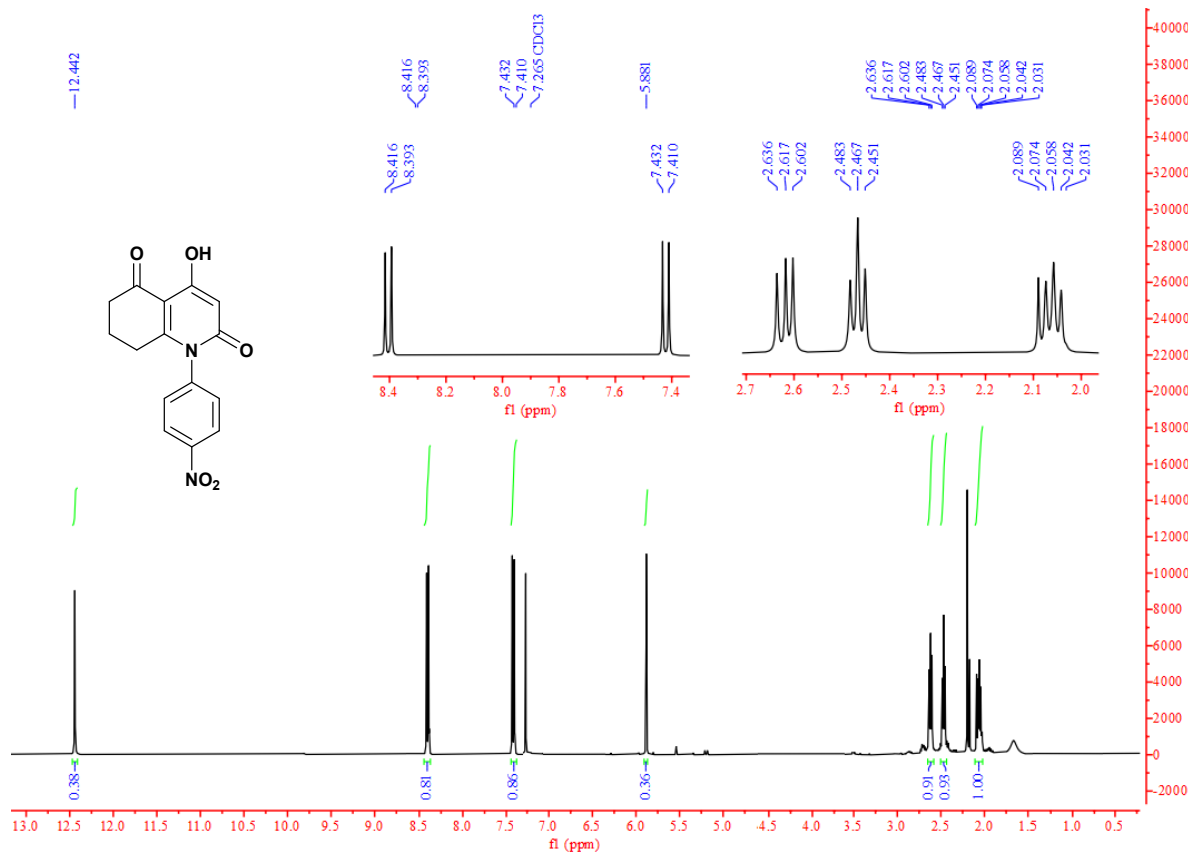

NMR <sup>1</sup>H spectrum (400 MHz, CDCl<sub>3</sub>): 4-hydroxy-1-(4-nitrophenyl)-7,8-dihydroquinoline-2,5(1H,6H)-dione

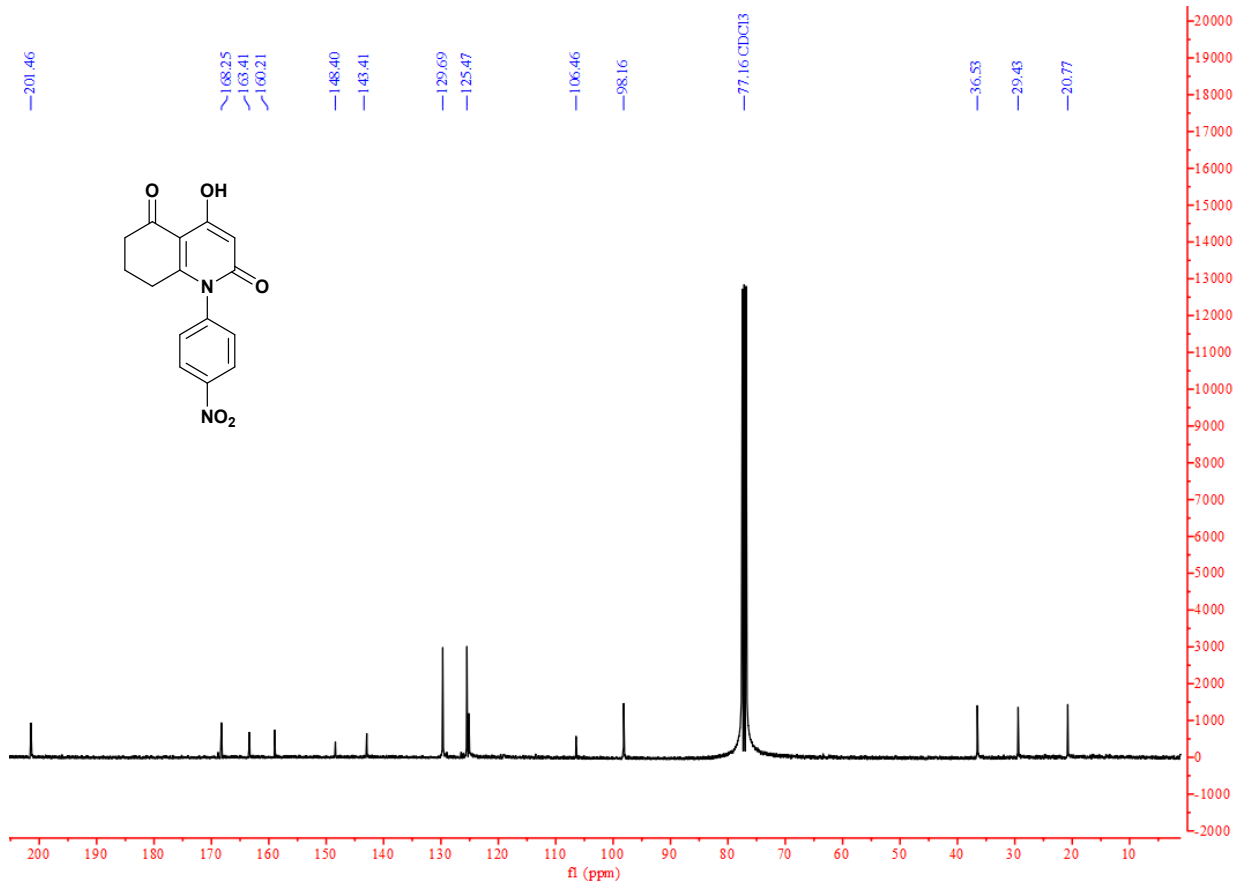

**NMR <sup>13</sup>C spectrum (101 MHz, CDCl<sub>3</sub>): 4-hydroxy-1-(4-nitrophenyl)-7,8-dihydroquinoline-2,5(1H,6H)-dione**

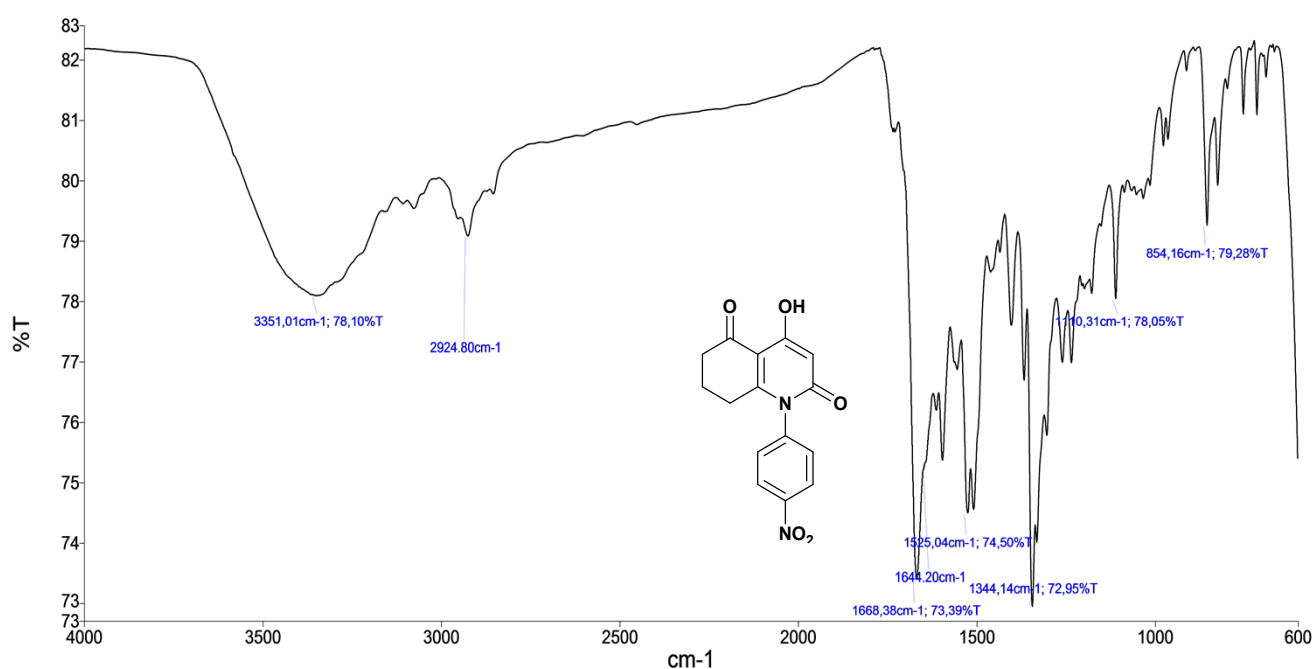

Nom Description  
 — PService 1227\_1 Échantillon 1227 Par PService Date lundi, décembre 12 2022

**IR spectrum: 4-hydroxy-1-(4-nitrophenyl)-7,8-dihydroquinoline-2,5(1H,6H)-dione**

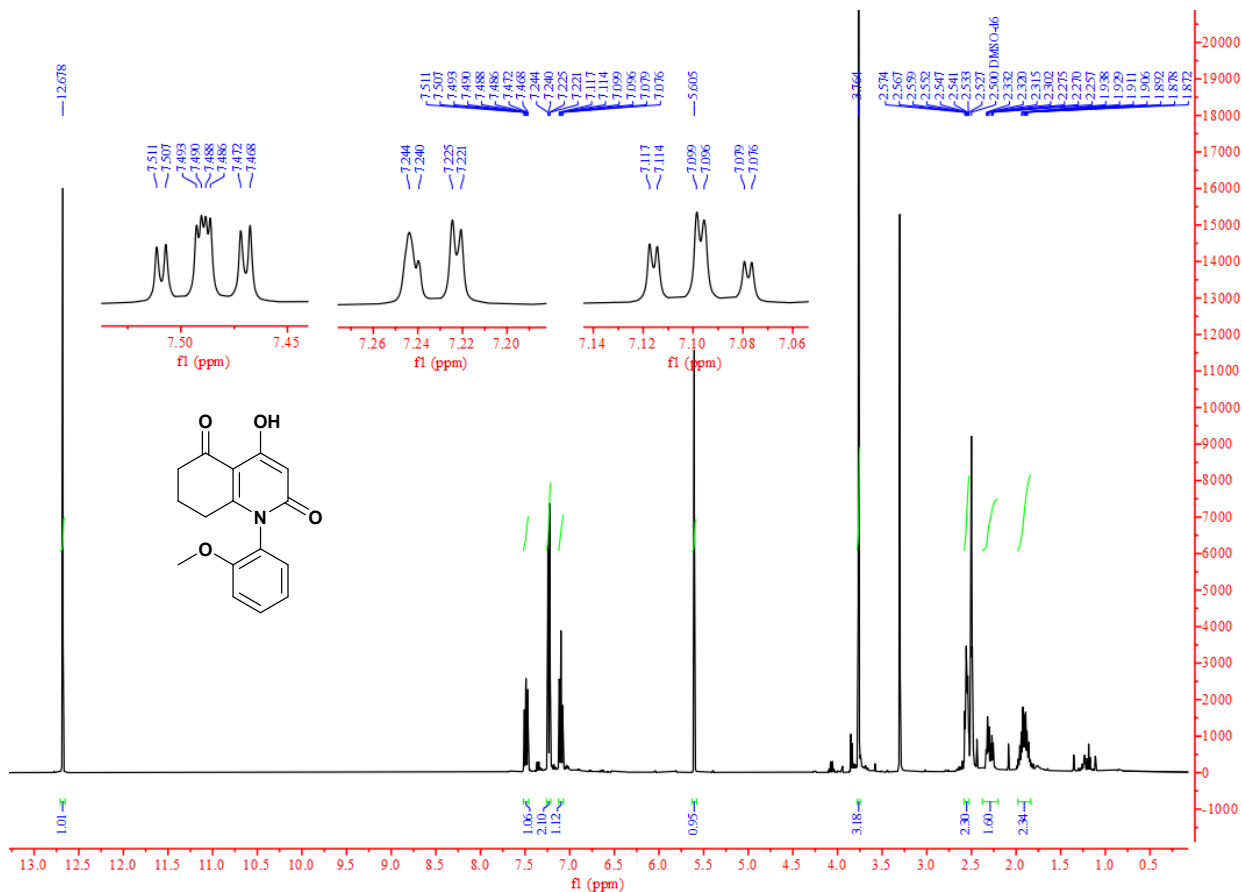

**NMR <sup>1</sup>H spectrum (400 MHz, DMSO-d<sub>6</sub>): 4-hydroxy-1-(2-methoxyphenyl)-7,8-dihydroquinoline-2,5(1H,6H)-dione**

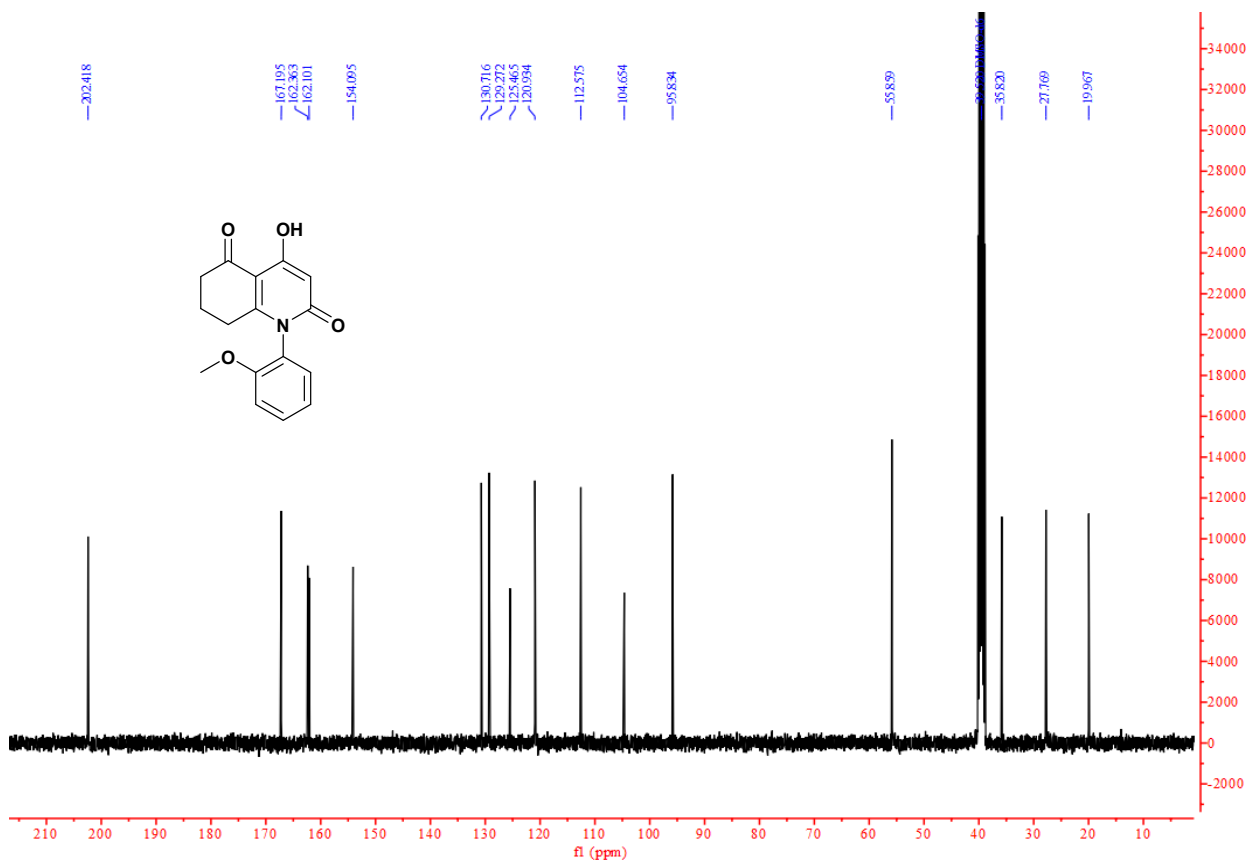

**NMR <sup>13</sup>C spectrum (101 MHz, DMSO-d<sub>6</sub>): 4-hydroxy-1-(2-methoxyphenyl)-7,8-dihydroquinoline-2,5(1H,6H)-dione**

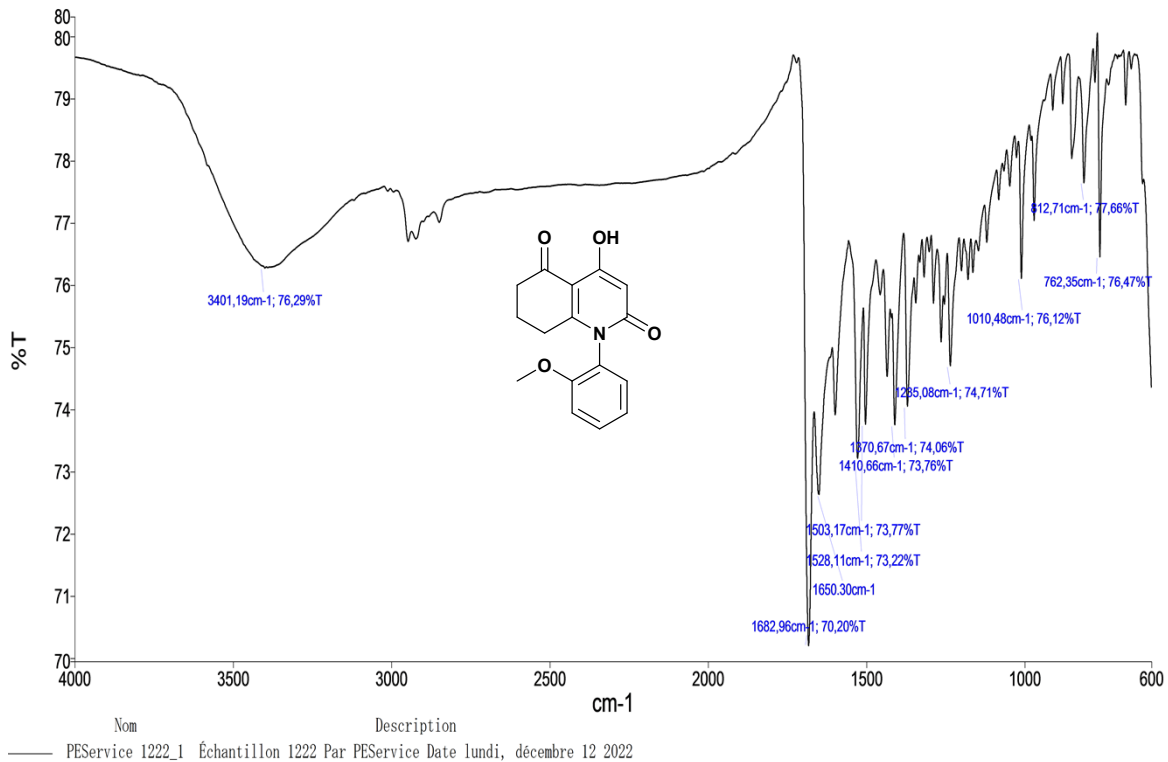

**IR spectrum: 4-hydroxy-1-(2-methoxyphenyl)-7,8-dihydroquinoline-2,5(1H,6H)-dione**

MS Spectrum

Line#:1 R.Time:----(Scan#:----)  
 MassPeaks:229  
 Spectrum Mode:Averaged 0,583-0,617(36-38) Base Peak:202(1569936)  
 BG Mode:Calc Segment 1 - Event 1

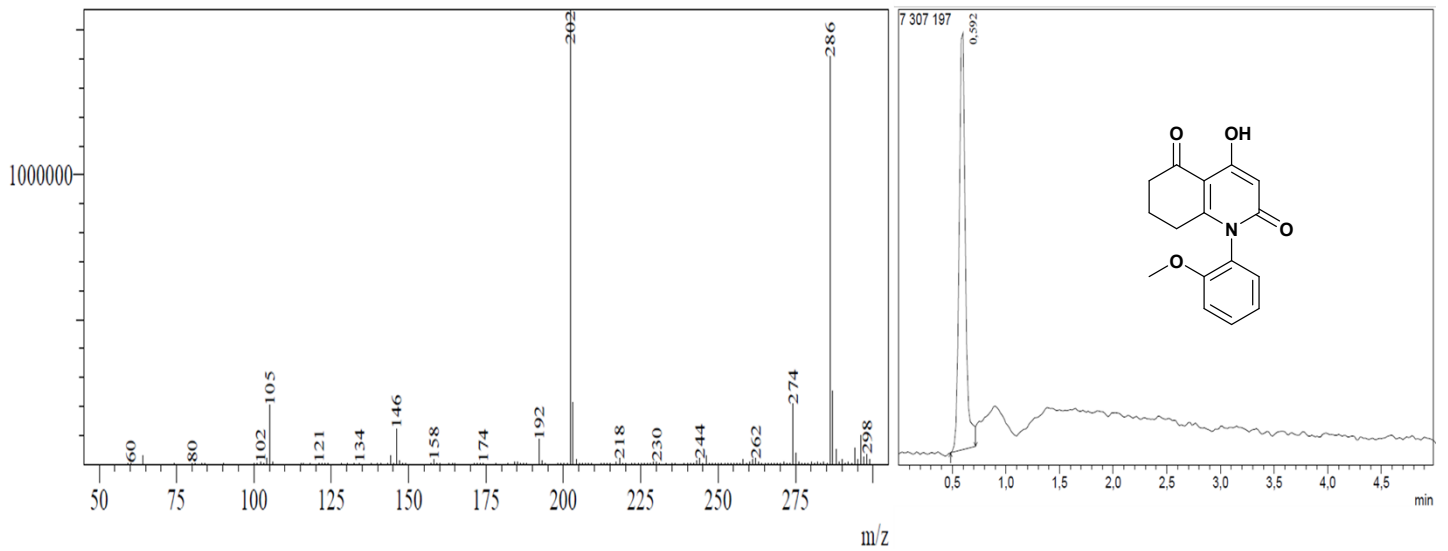

**LC-MS spectrum: 4-hydroxy-1-(2-methoxyphenyl)-7,8-dihydroquinoline-2,5(1H,6H)-dione**

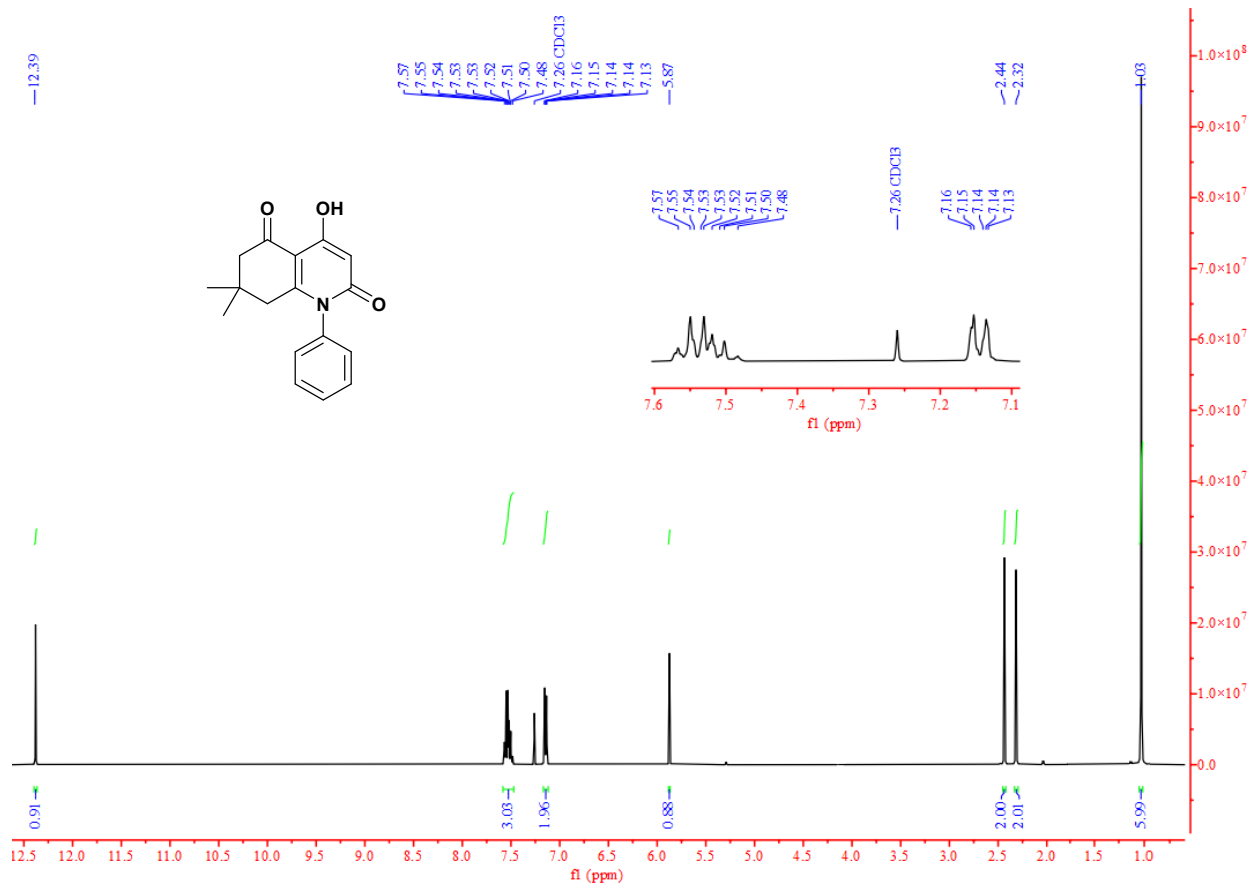

**NMR <sup>1</sup>H spectrum (400 MHz, CDCl<sub>3</sub>): 4-hydroxy-7,7-dimethyl-1-phenyl-7,8-dihydroquinoline-2,5(1H,6H)-dione**

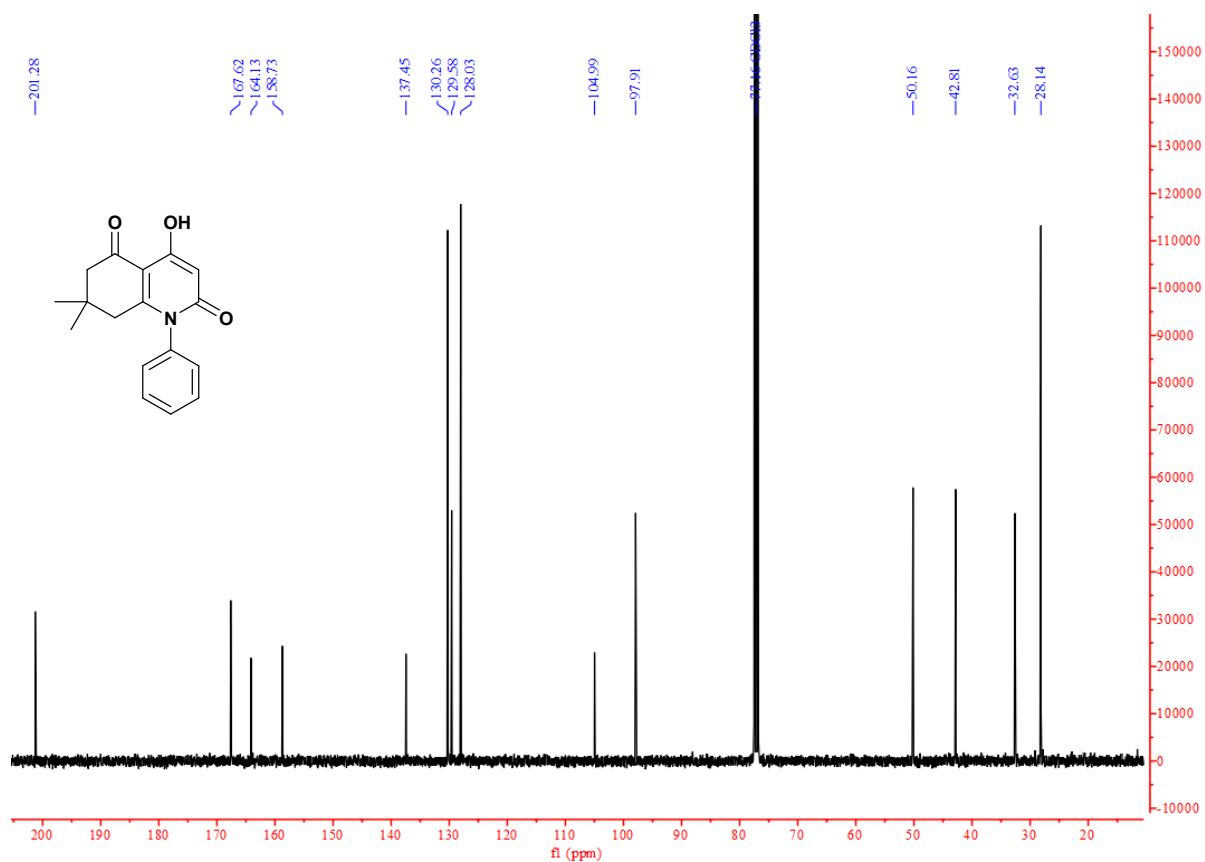

**NMR <sup>13</sup>C spectrum (101 MHz, CDCl<sub>3</sub>): 4-hydroxy-7,7-dimethyl-1-phenyl-7,8-dihydroquinoline-2,5(1H,6H)-dione**

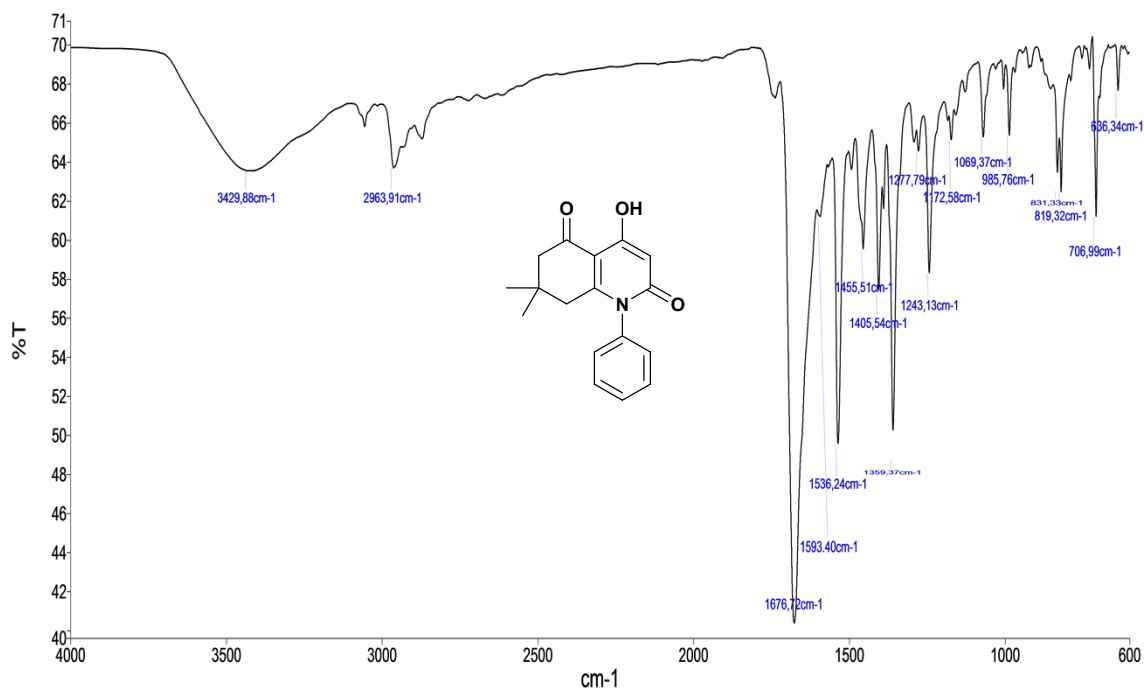

**IR spectrum:** 4-hydroxy-7,7-dimethyl-1-phenyl-7,8-dihydroquinoline-2,5(1H,6H)-dione

MS Spectrum

Line#:1 R.Time:----(Scan#:----)

MassPeaks:147

Spectrum Mode:Averaged 0.650-0.833(40-51) Base Peak:284(416270)

BG Mode:Calc Segment 1 - Event 1

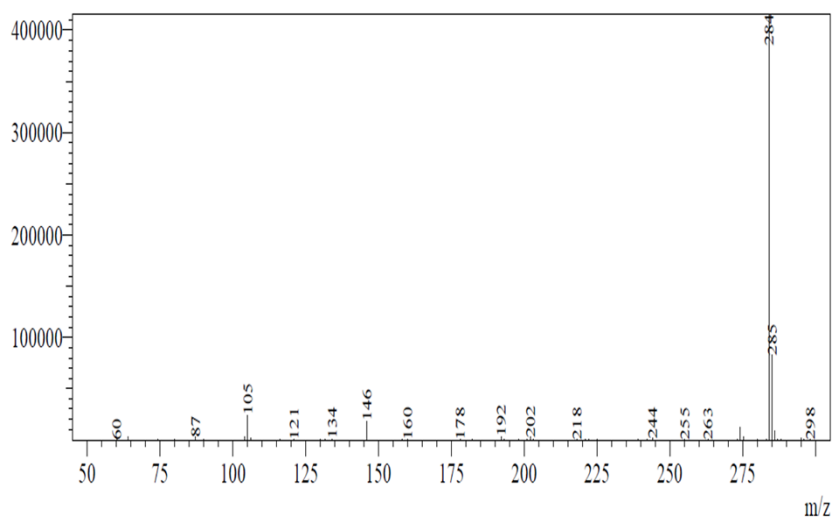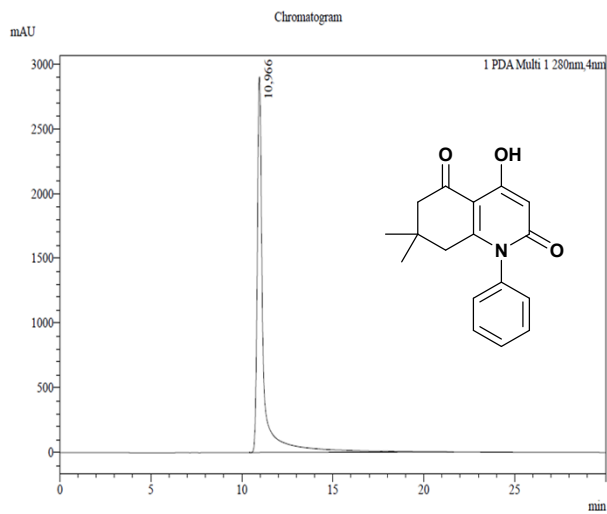

**LC-MS spectrum:** 4-hydroxy-7,7-dimethyl-1-phenyl-7,8-dihydroquinoline-2,5(1H,6H)-dione



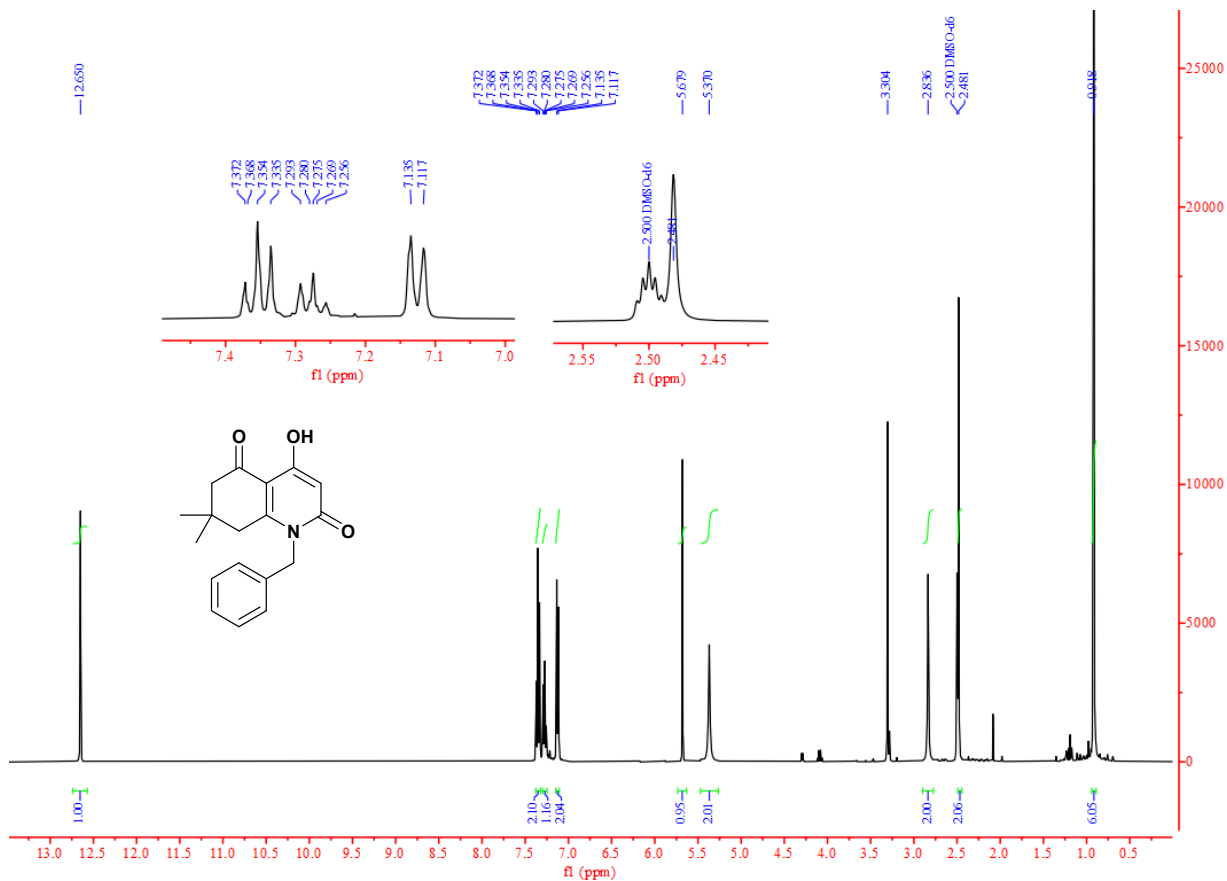

NMR  $^1\text{H}$  spectrum (400 MHz,  $\text{DMSO-d}_6$ ): 1-benzyl-4-hydroxy-7,7-dimethyl-7,8-dihydroquinoline-2,5(1H,6H)-dione

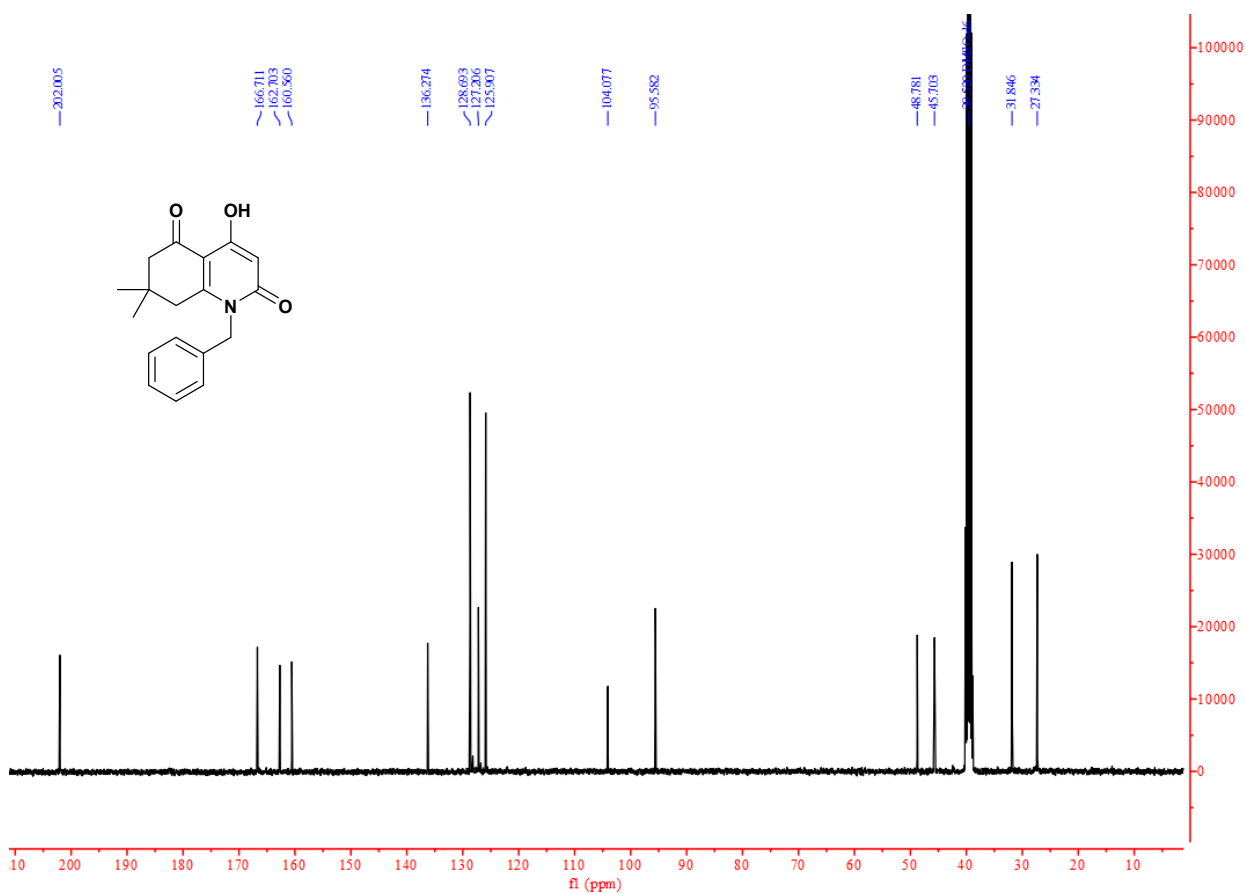

NMR  $^{13}\text{C}$  spectrum (101 MHz,  $\text{DMSO-d}_6$ ): 1-benzyl-4-hydroxy-7,7-dimethyl-7,8-dihydroquinoline-2,5(1H,6H)-dione

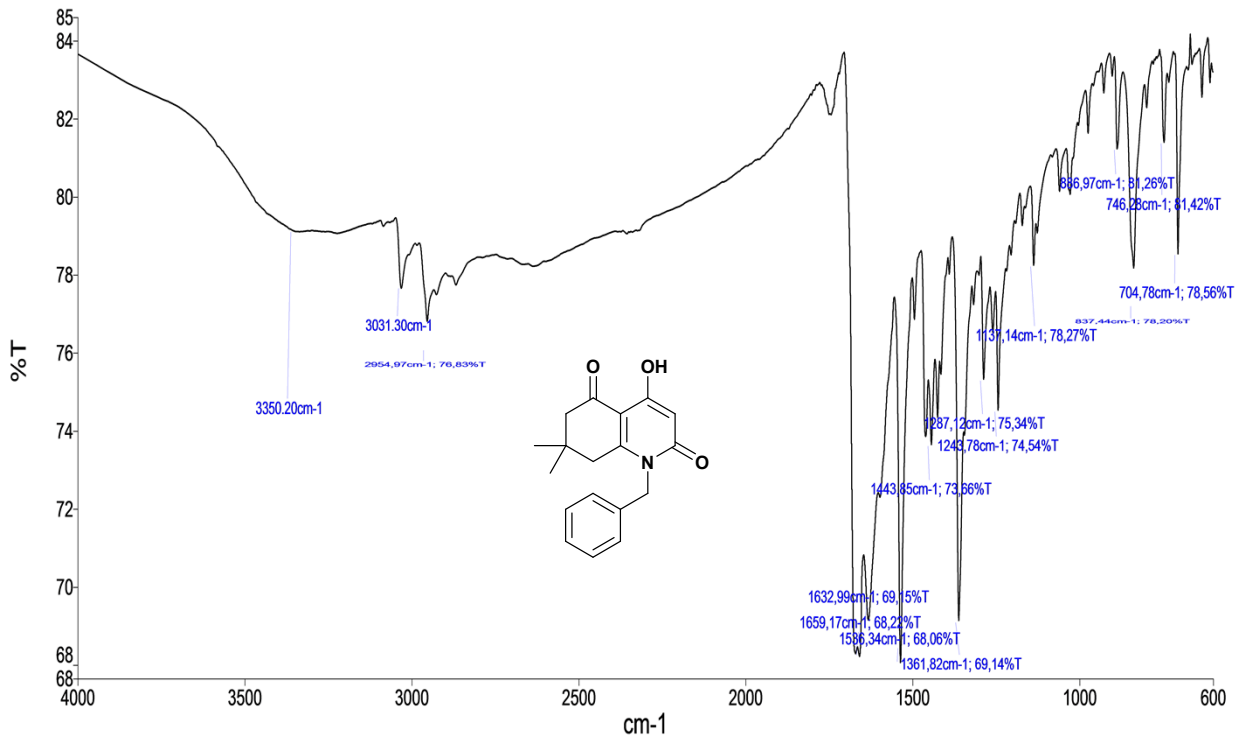

MS Spectrum

Line#:1 R.Time:----(Scan#:----)  
 MassPeaks:222  
 Spectrum Mode:Averaged 0,550-0,583(34-36) Base Peak:298(305291)  
 BG Mode:Calc Segment 1 - Event 1

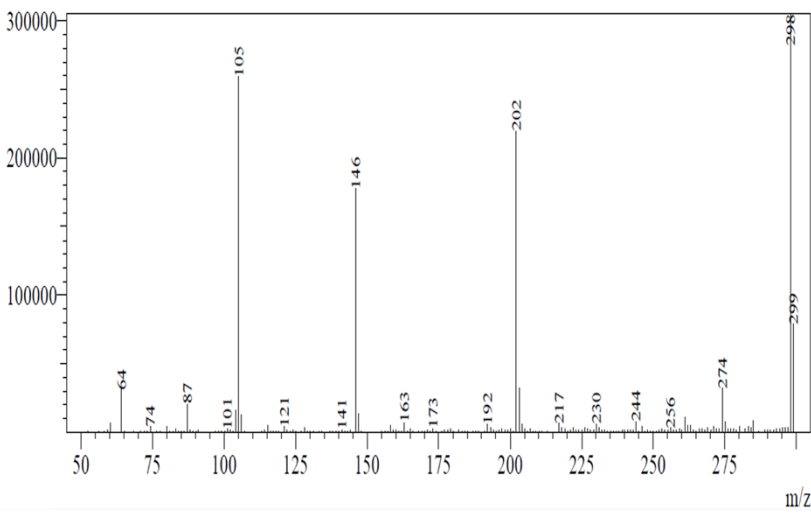

Chromatogram

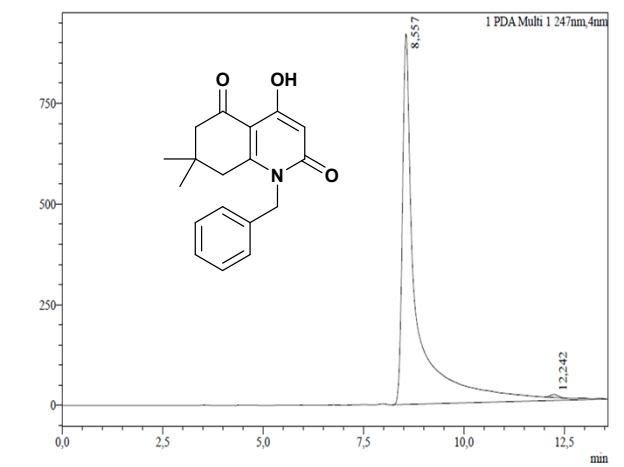

LC-MS spectrum: 1-benzyl-4-hydroxy-7,7-dimethyl-7,8-dihydroquinoline-2,5(1H,6H)-dione

BFM BOUONE IBTK.54.fid

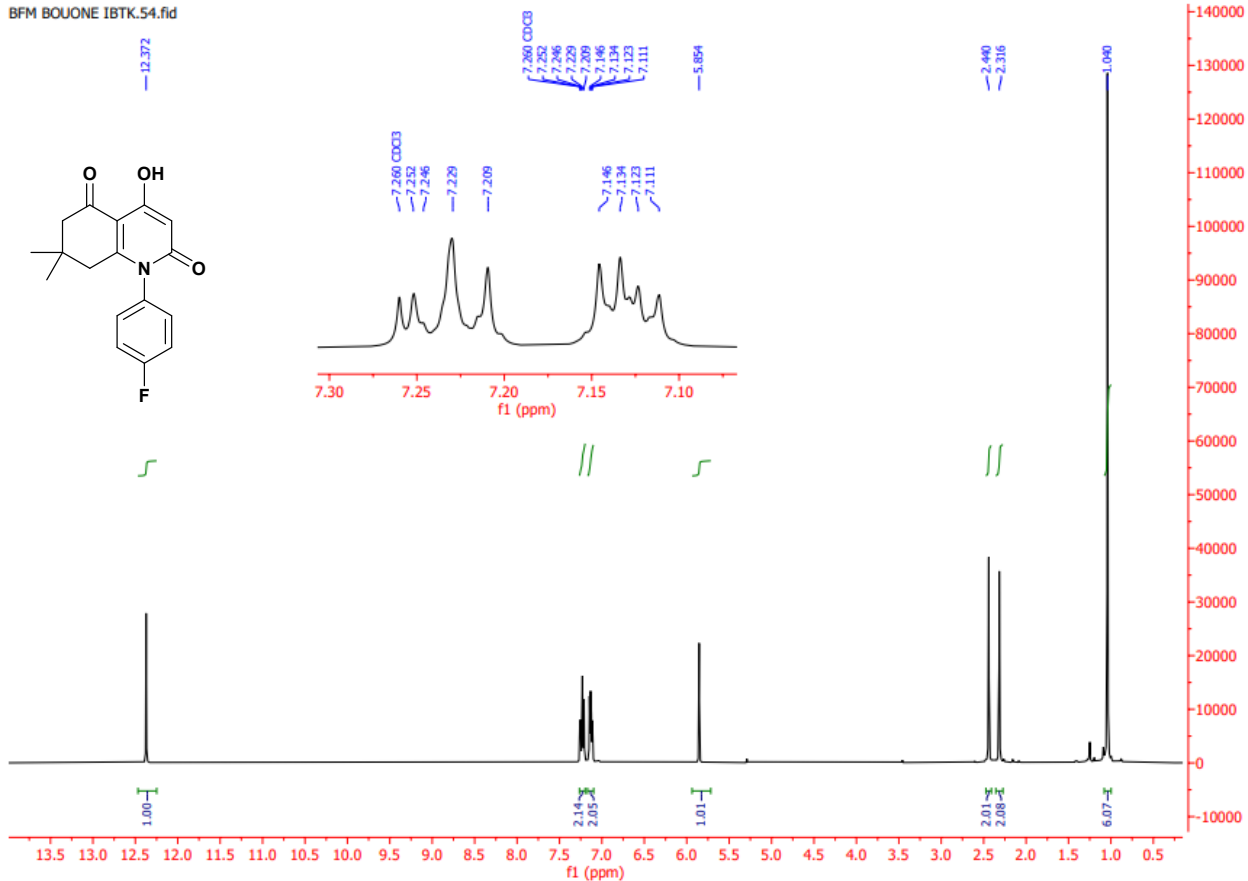

**NMR <sup>1</sup>H spectrum (400 MHz, CDCl<sub>3</sub>):** 1-(4-fluorophenyl)-4-hydroxy-7,7-dimethyl-7,8-dihydroquinoline-2,5(1H,6H)-dione

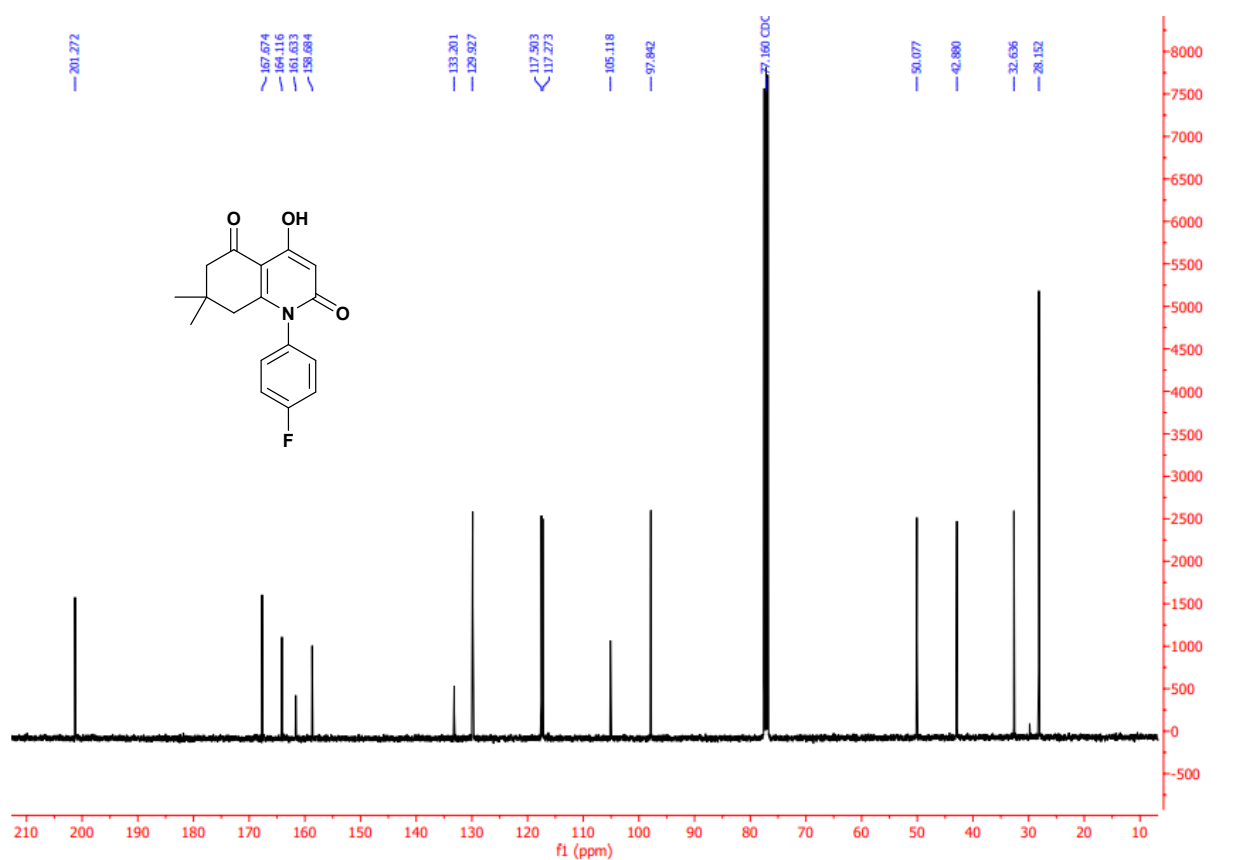

**NMR <sup>13</sup>C spectrum (101 MHz, CDCl<sub>3</sub>):** 1-(4-fluorophenyl)-4-hydroxy-7,7-dimethyl-7,8-dihydroquinoline-2,5(1H,6H)-dione

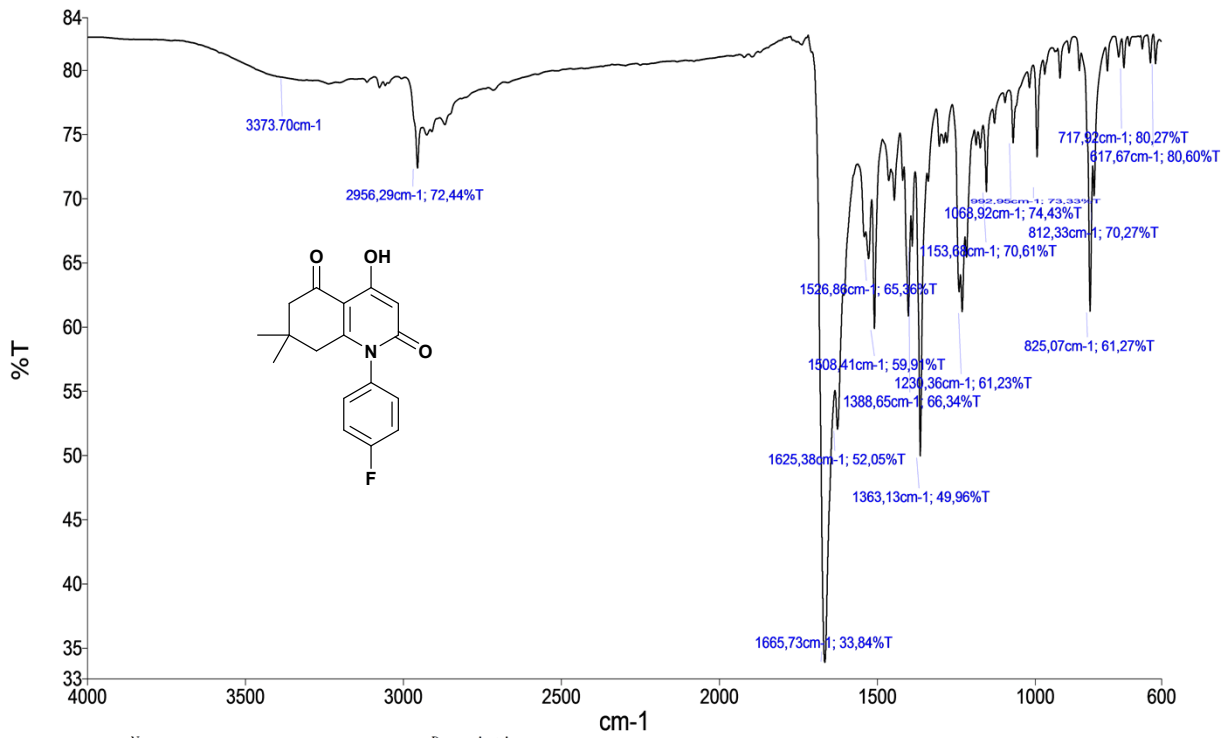

Nom Description  
 PEService 824\_1 Échantillon 824 Par PEService Date mardi, février 08 2022

**IR spectrum: 1-(4-fluorophenyl)-4-hydroxy-7,7-dimethyl-7,8-dihydroquinoline-2,5(1H,6H)-dione**

MS Spectrum

Line#:1 R.Time:----(Scan#:----)  
 MassPeaks:28  
 Spectrum Mode:Averaged 0.072-0.086(21-25) Base Peak:312(219040)  
 BG Mode:Calc Segment 1 - Event 1

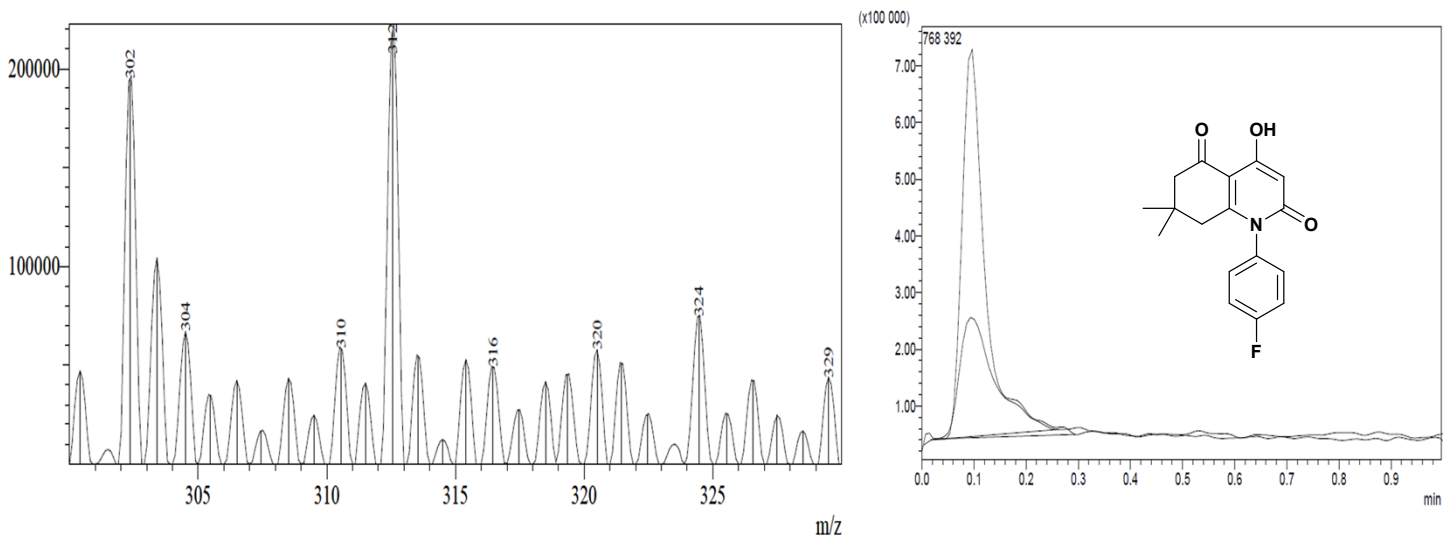

**LC-MS spectrum: 1-(4-fluorophenyl)-4-hydroxy-7,7-dimethyl-7,8-dihydroquinoline-2,5(1H,6H)-dione**

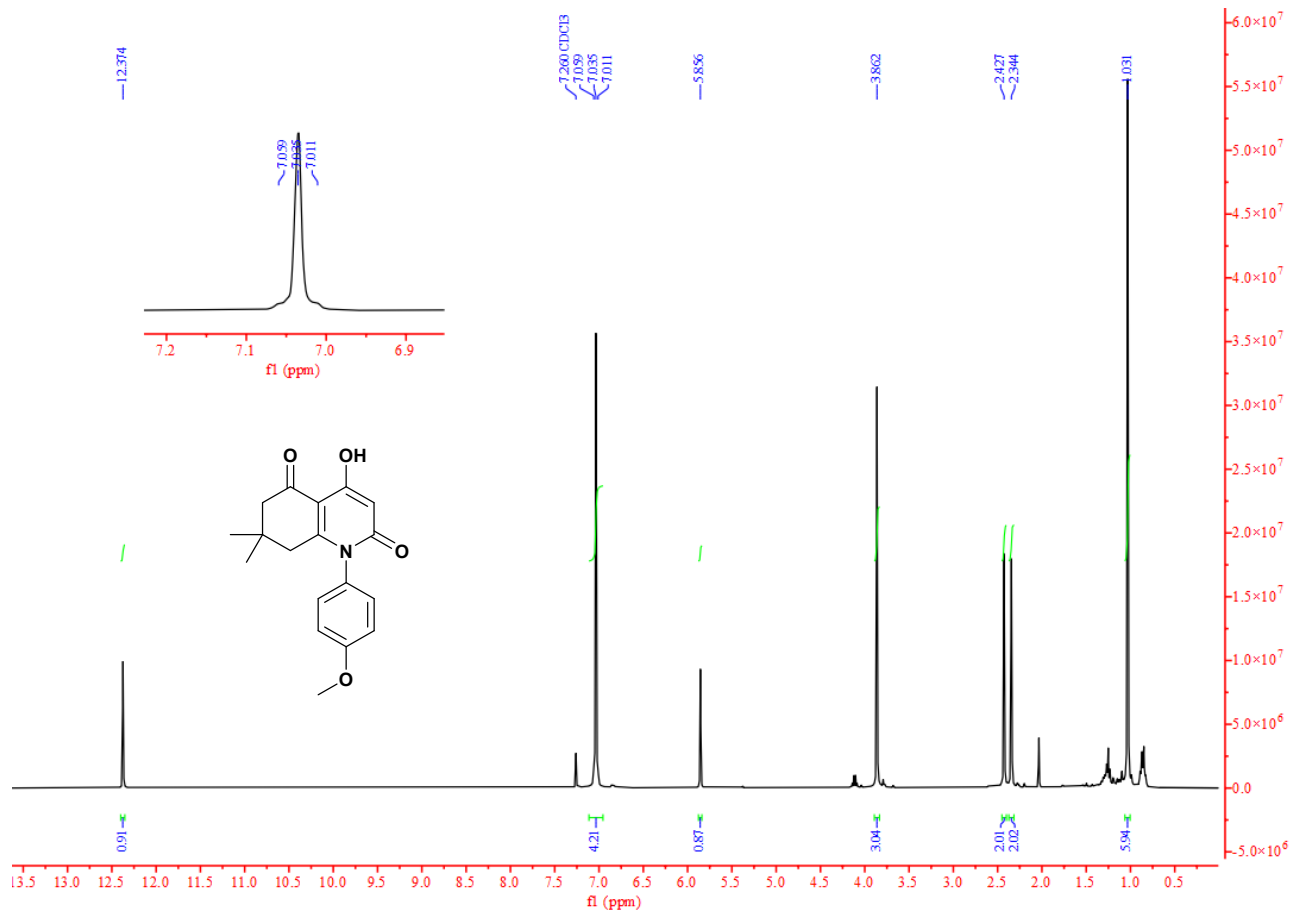

**NMR <sup>1</sup>H spectrum (400 MHz, CDCl<sub>3</sub>):** 4-hydroxy-1-(4-methoxyphenyl)-7,7-dimethyl-7,8-dihydroquinoline-2,5(1H,6H)-dione

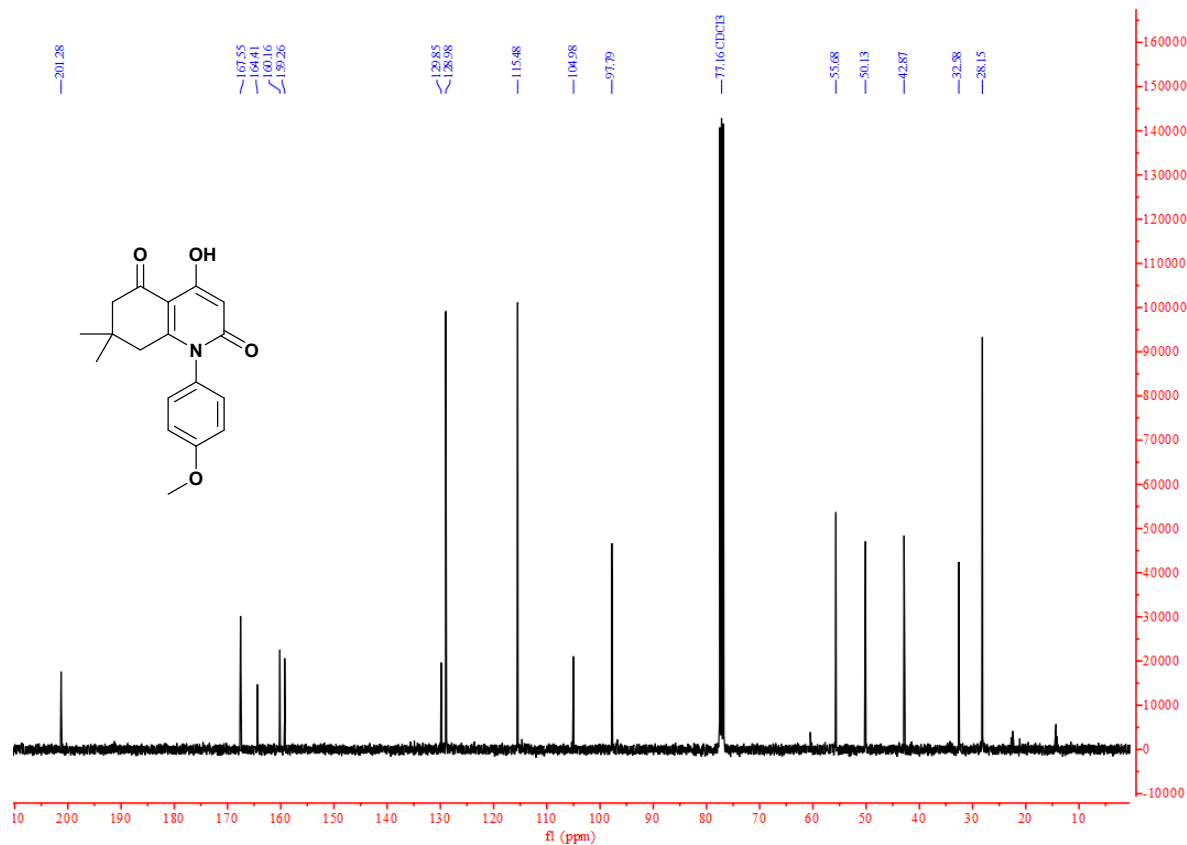

**NMR <sup>13</sup>C spectrum (101 MHz, CDCl<sub>3</sub>):** 4-hydroxy-1-(4-methoxyphenyl)-7,7-dimethyl-7,8-dihydroquinoline-2,5(1H,6H)-dione

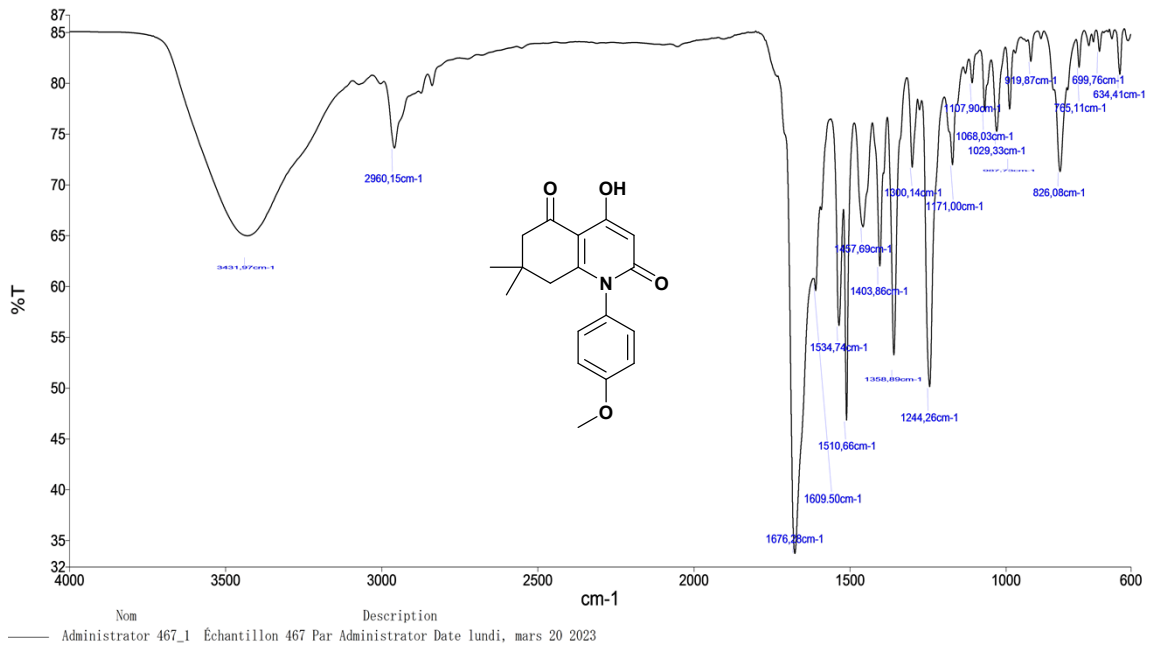

**IR spectrum:** 4-hydroxy-1-(4-methoxyphenyl)-7,7-dimethyl-7,8-dihydroquinoline-2,5(1H,6H)-dione

MS Spectrum

Line#:1 R.Time:---(Scan#:---)  
 MassPeaks:134  
 Spectrum Mode:Averaged 0,500-0,633(31-39) Base Peak:314(323837)  
 BG Mode:Averaged 0,000-4,983(1-300) Segment 1 - Event 1

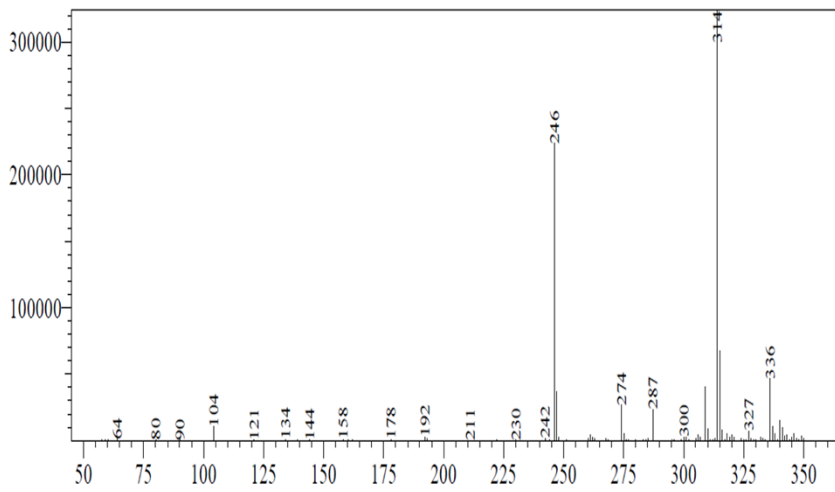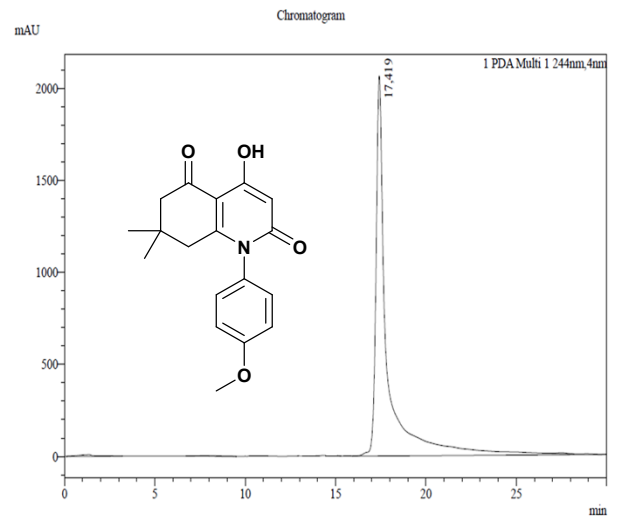

**LC-MS spectrum:** 4-hydroxy-1-(4-methoxyphenyl)-7,7-dimethyl-7,8-dihydroquinoline-2,5(1H,6H)-dione

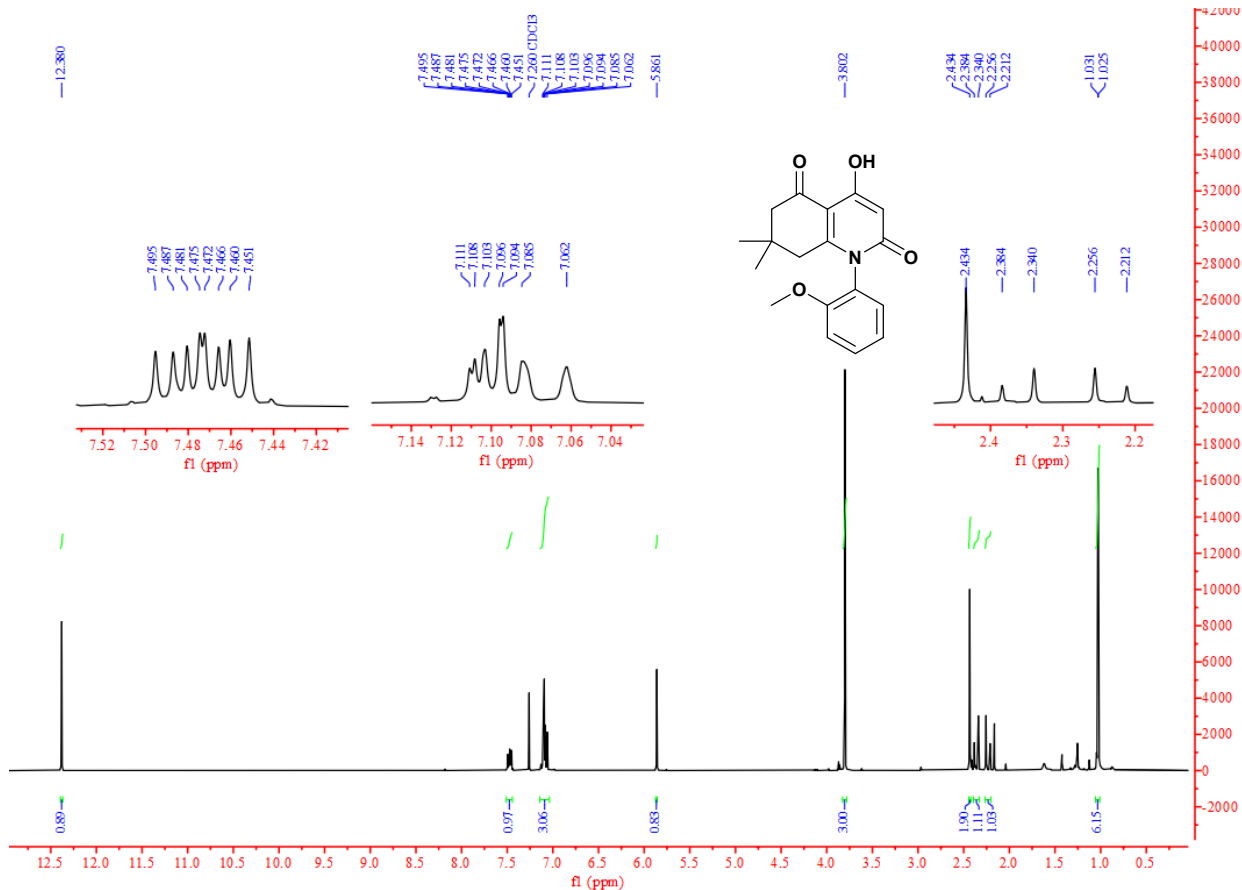

**NMR <sup>1</sup>H spectrum (400 MHz, CDCl<sub>3</sub>): 4-hydroxy-1-(2-methoxyphenyl)-7,7-dimethyl-7,8-dihydroquinoline-2,5(1H,6H)-dione**

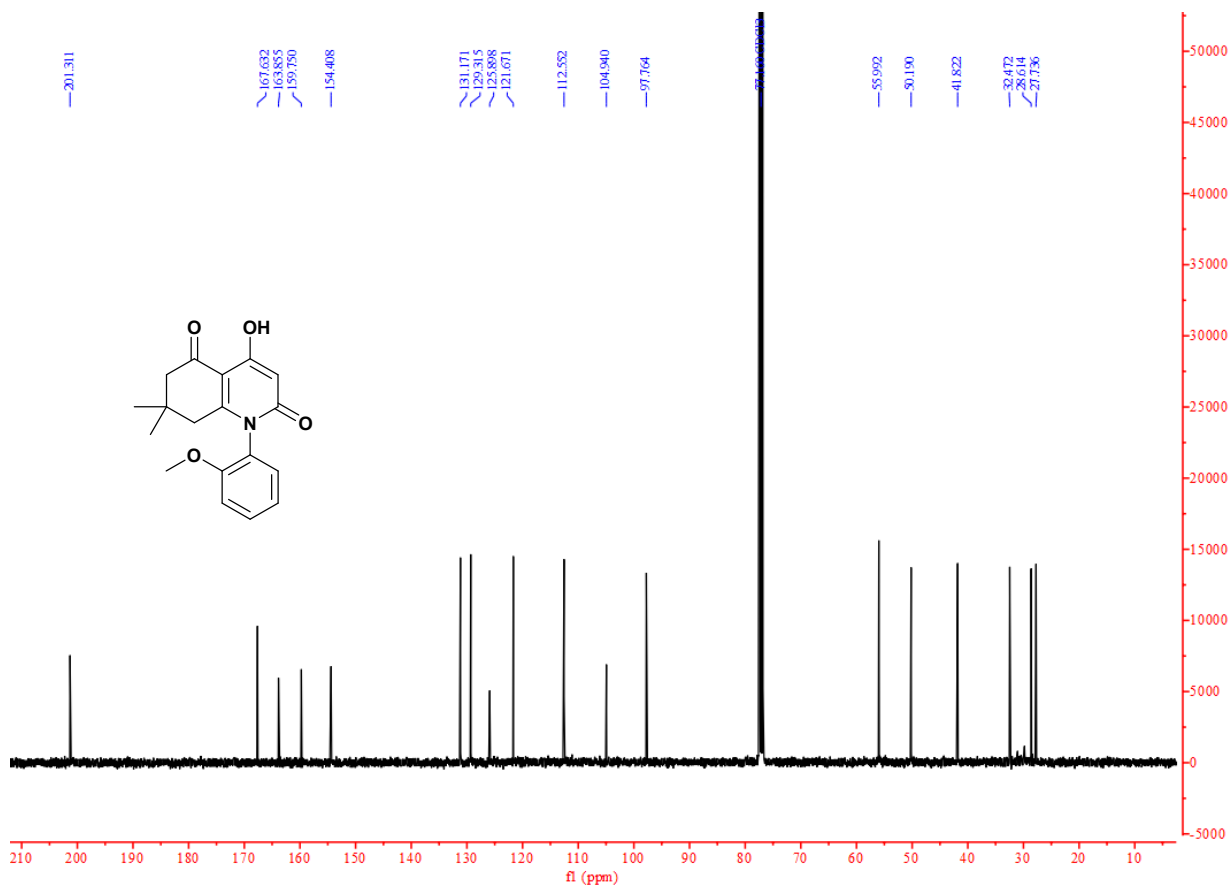

**NMR <sup>13</sup>C spectrum (101 MHz, CDCl<sub>3</sub>): 4-hydroxy-1-(2-methoxyphenyl)-7,7-dimethyl-7,8-dihydroquinoline-2,5(1H,6H)-dione**

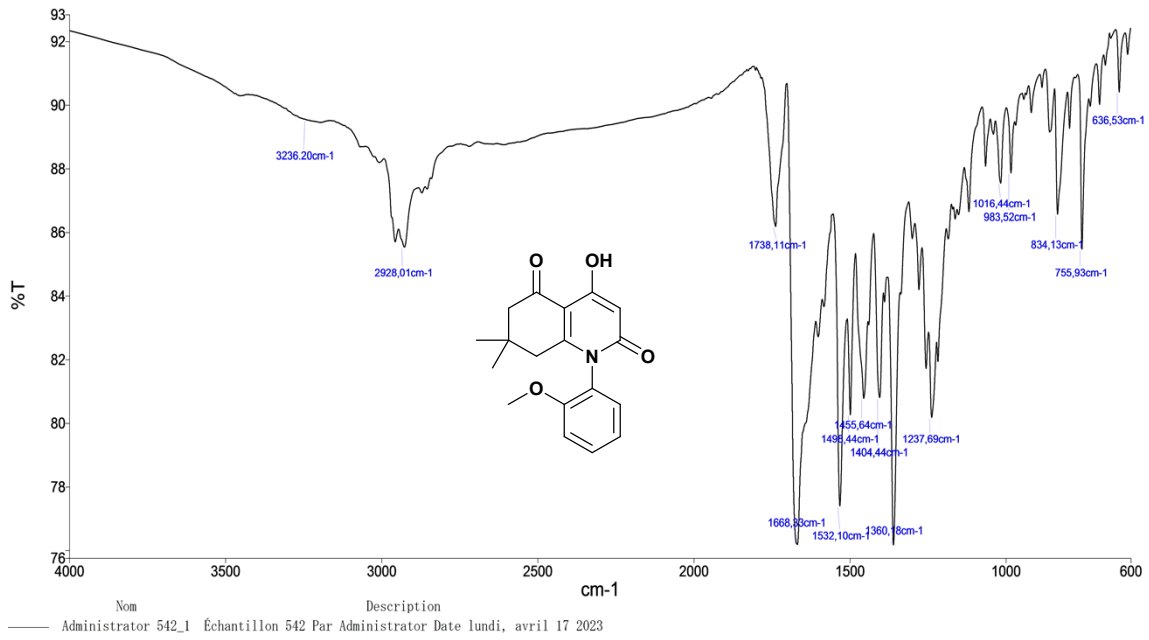

**IR spectrum: 4-hydroxy-1-(2-methoxyphenyl)-7,7-dimethyl-7,8-dihydroquinoline-2,5(1H,6H)-dione**

MS Spectrum

Line#:1 R.Time:---(Scan#:---)  
 MassPeaks:229  
 Spectrum Mode:Averaged 0,567-0,600(35-37) Base Peak:314(562611)  
 BG Mode:Calc Segment 1 - Event 1

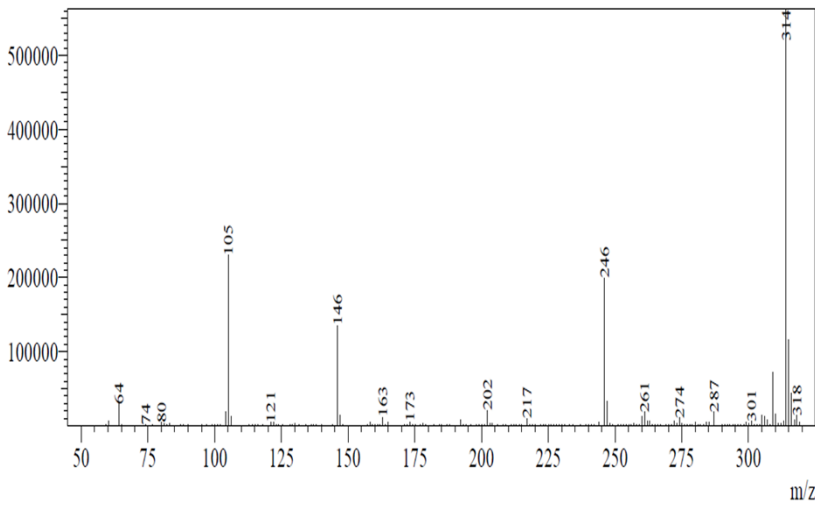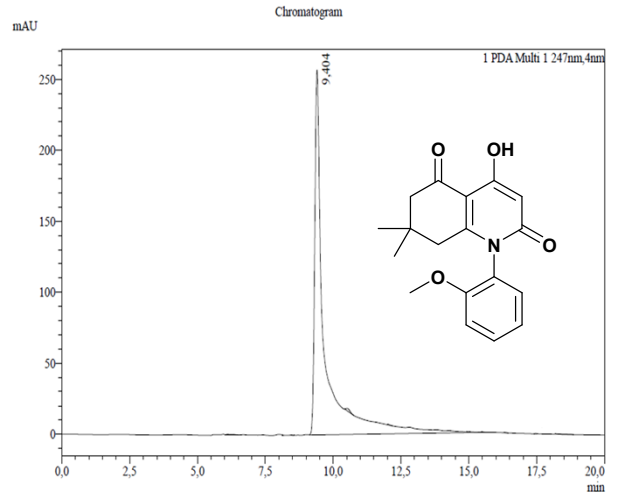

**LC-MS spectrum: 4-hydroxy-1-(2-methoxyphenyl)-7,7-dimethyl-7,8-dihydroquinoline-2,5(1H,6H)-dione**



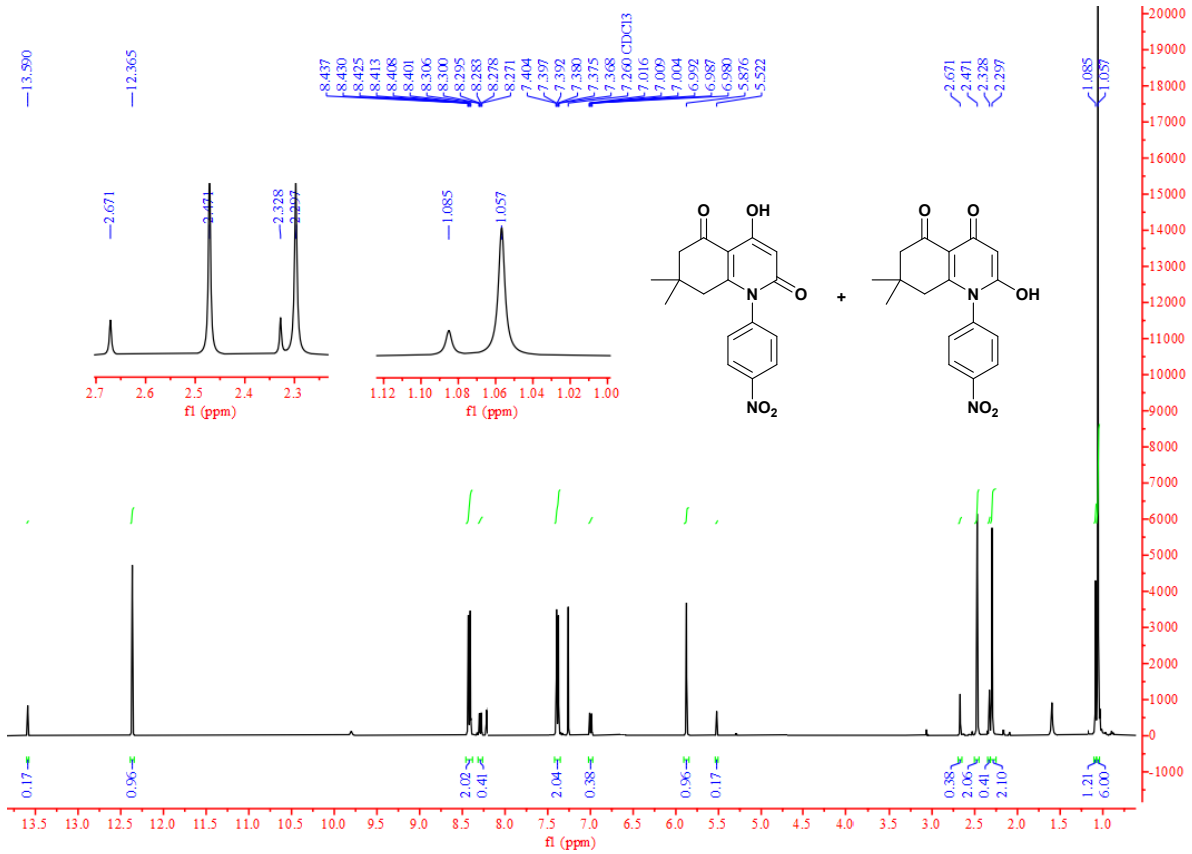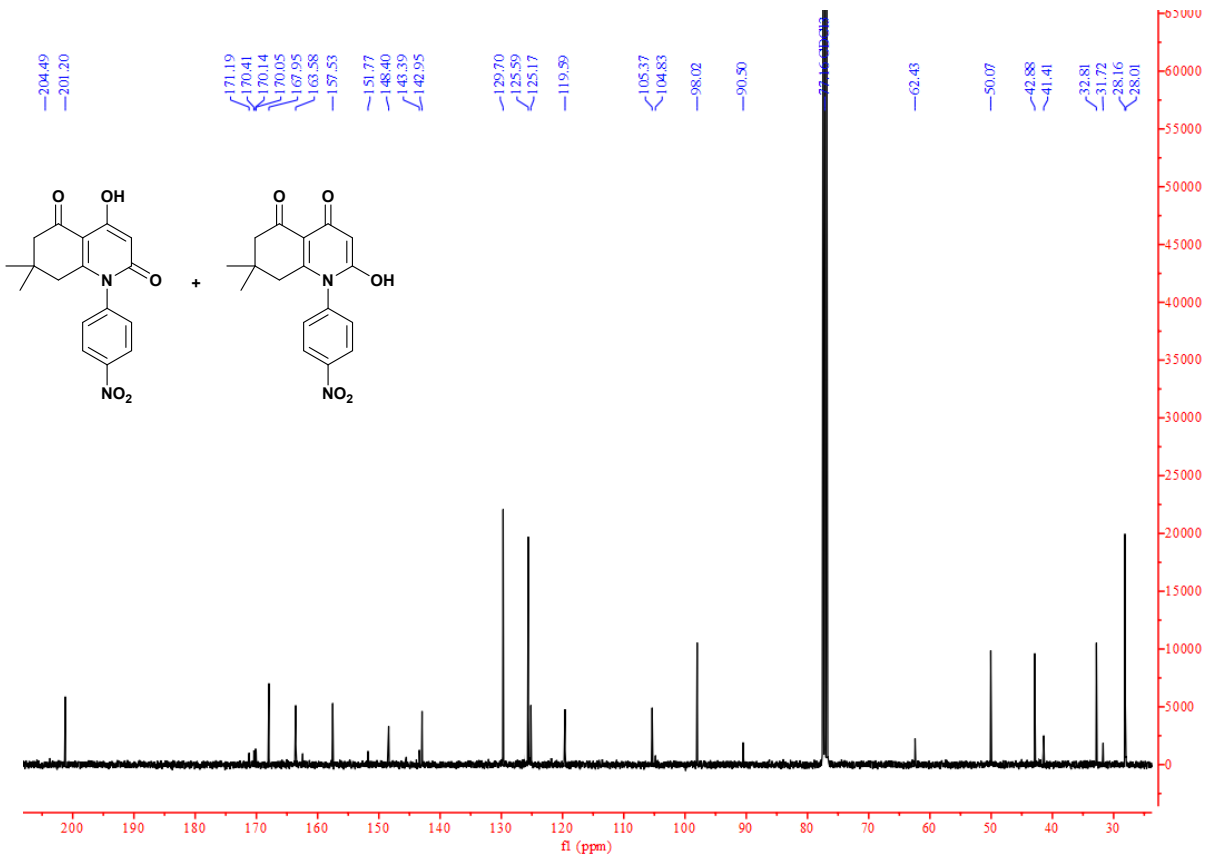

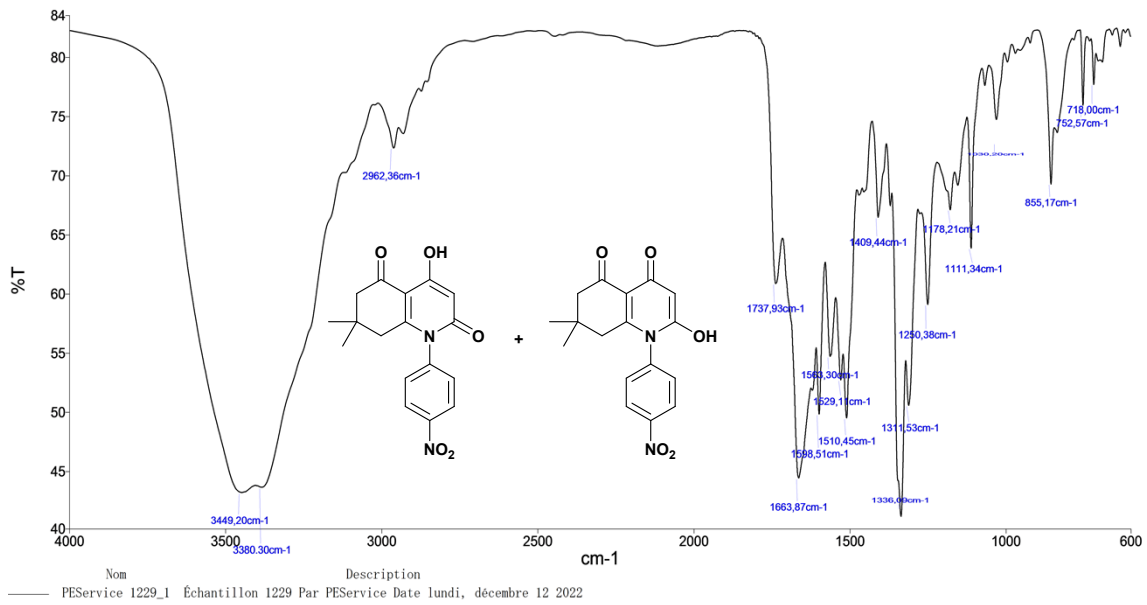

**IR spectrum: 4-hydroxy-7,7-dimethyl-1-(4-nitrophenyl)-7,8-dihydroquinoline-2,5(1H,6H)-dione + 2-hydroxy-7,7-dimethyl-1-(4-nitrophenyl)-7,8-dihydroquinoline-4,5(1H,6H)-dione**
